# Supplementary material
Source: publisher site journal article supplement (https://www.dovepress.com/article/291579)
Supplement: Supplementary file 1 [file get_supplementary_file.php]

**Thiazole Based Thiosemicarbazones: Synthesis, Cytotoxicity Evaluation and Molecular Docking Study**

**Supplementary data**

**
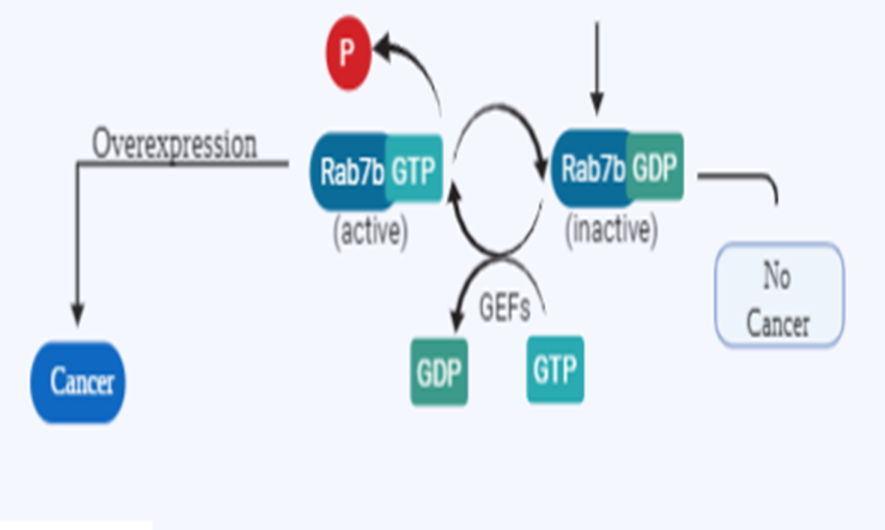
**

**Figure S1.** Biochemical pathway of human Rab7b protein

**
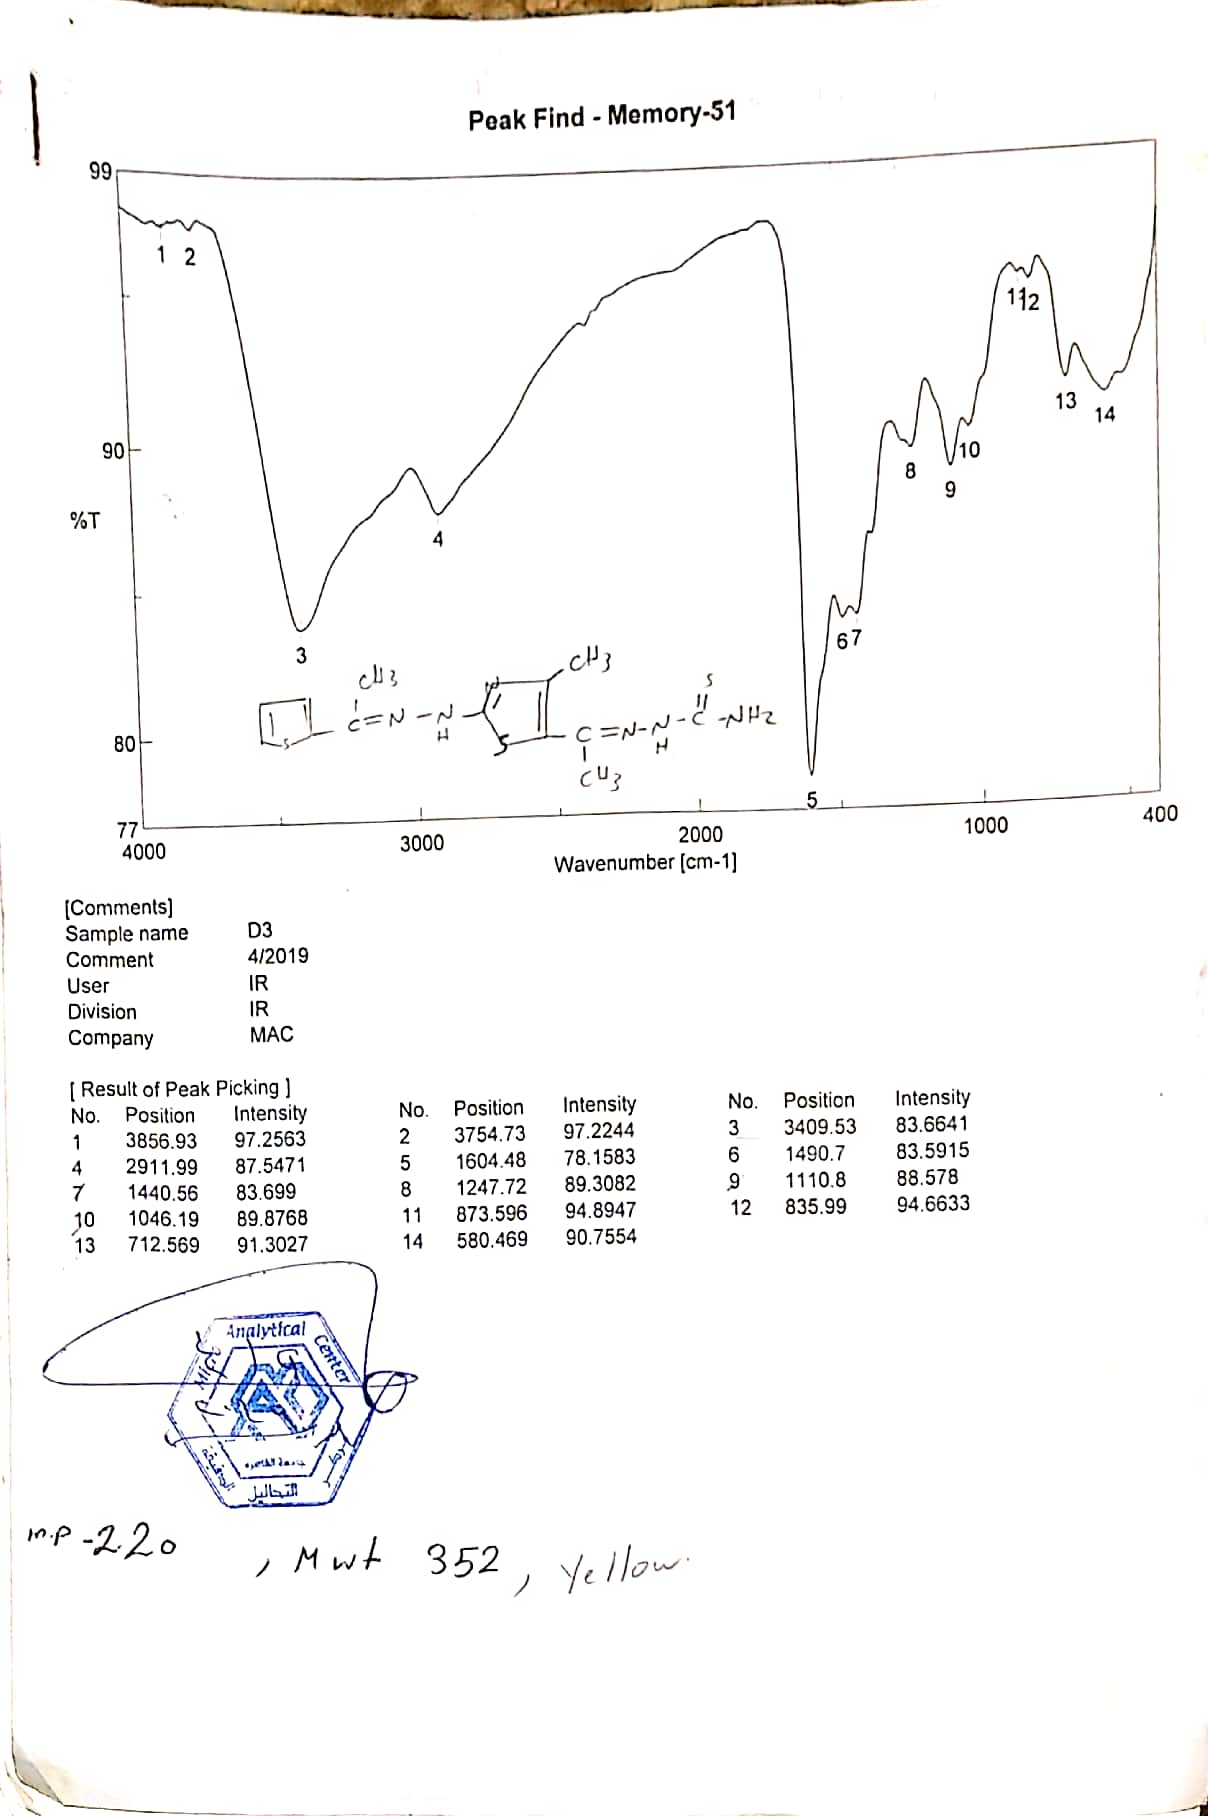
**

**IR of compound 3**

**
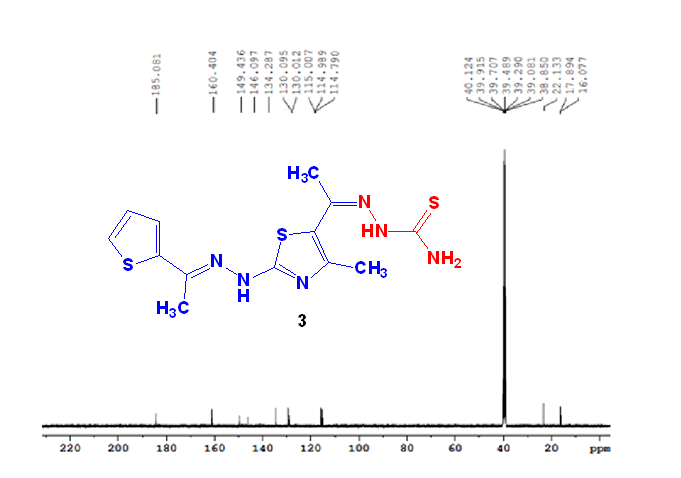
**

**13C-NMR of compound 3**

**
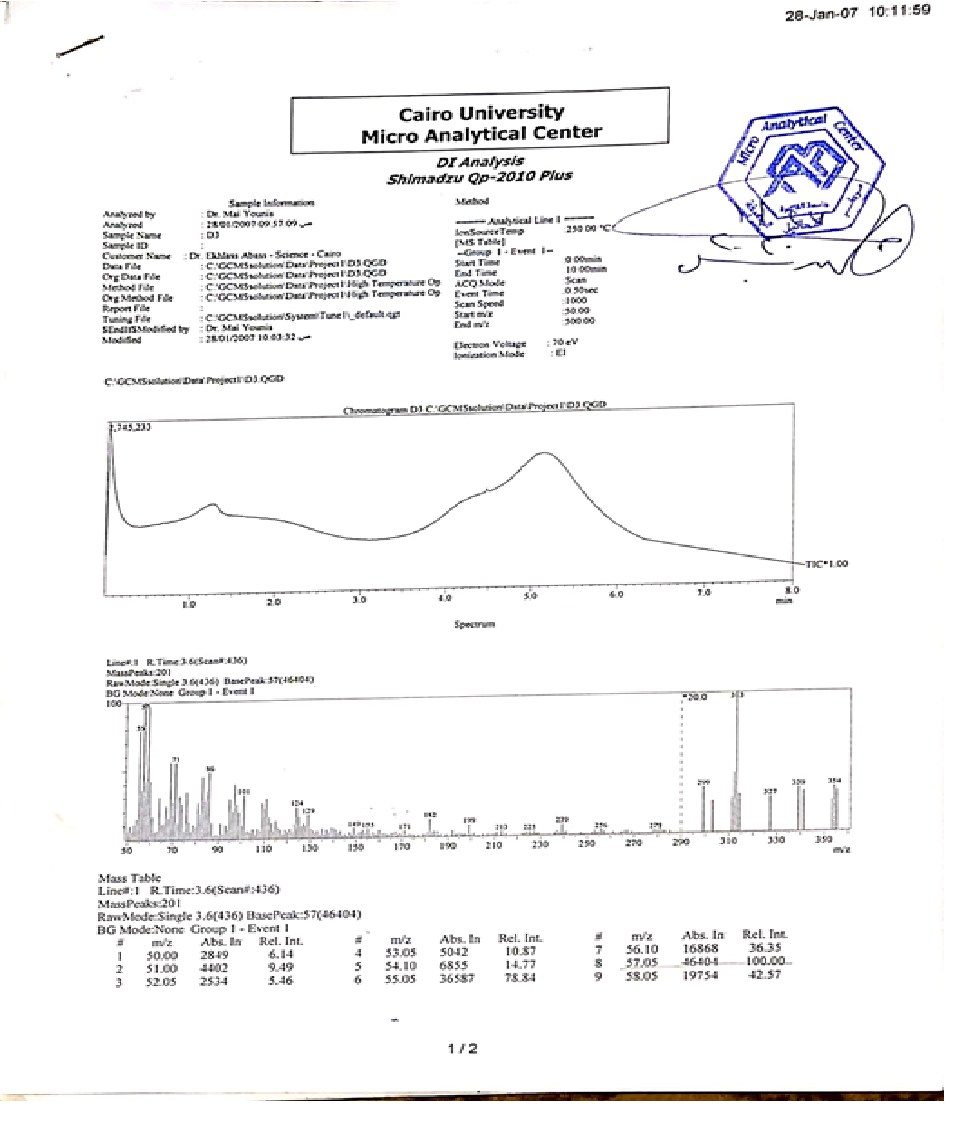
**

**Mass of compound 3**

**
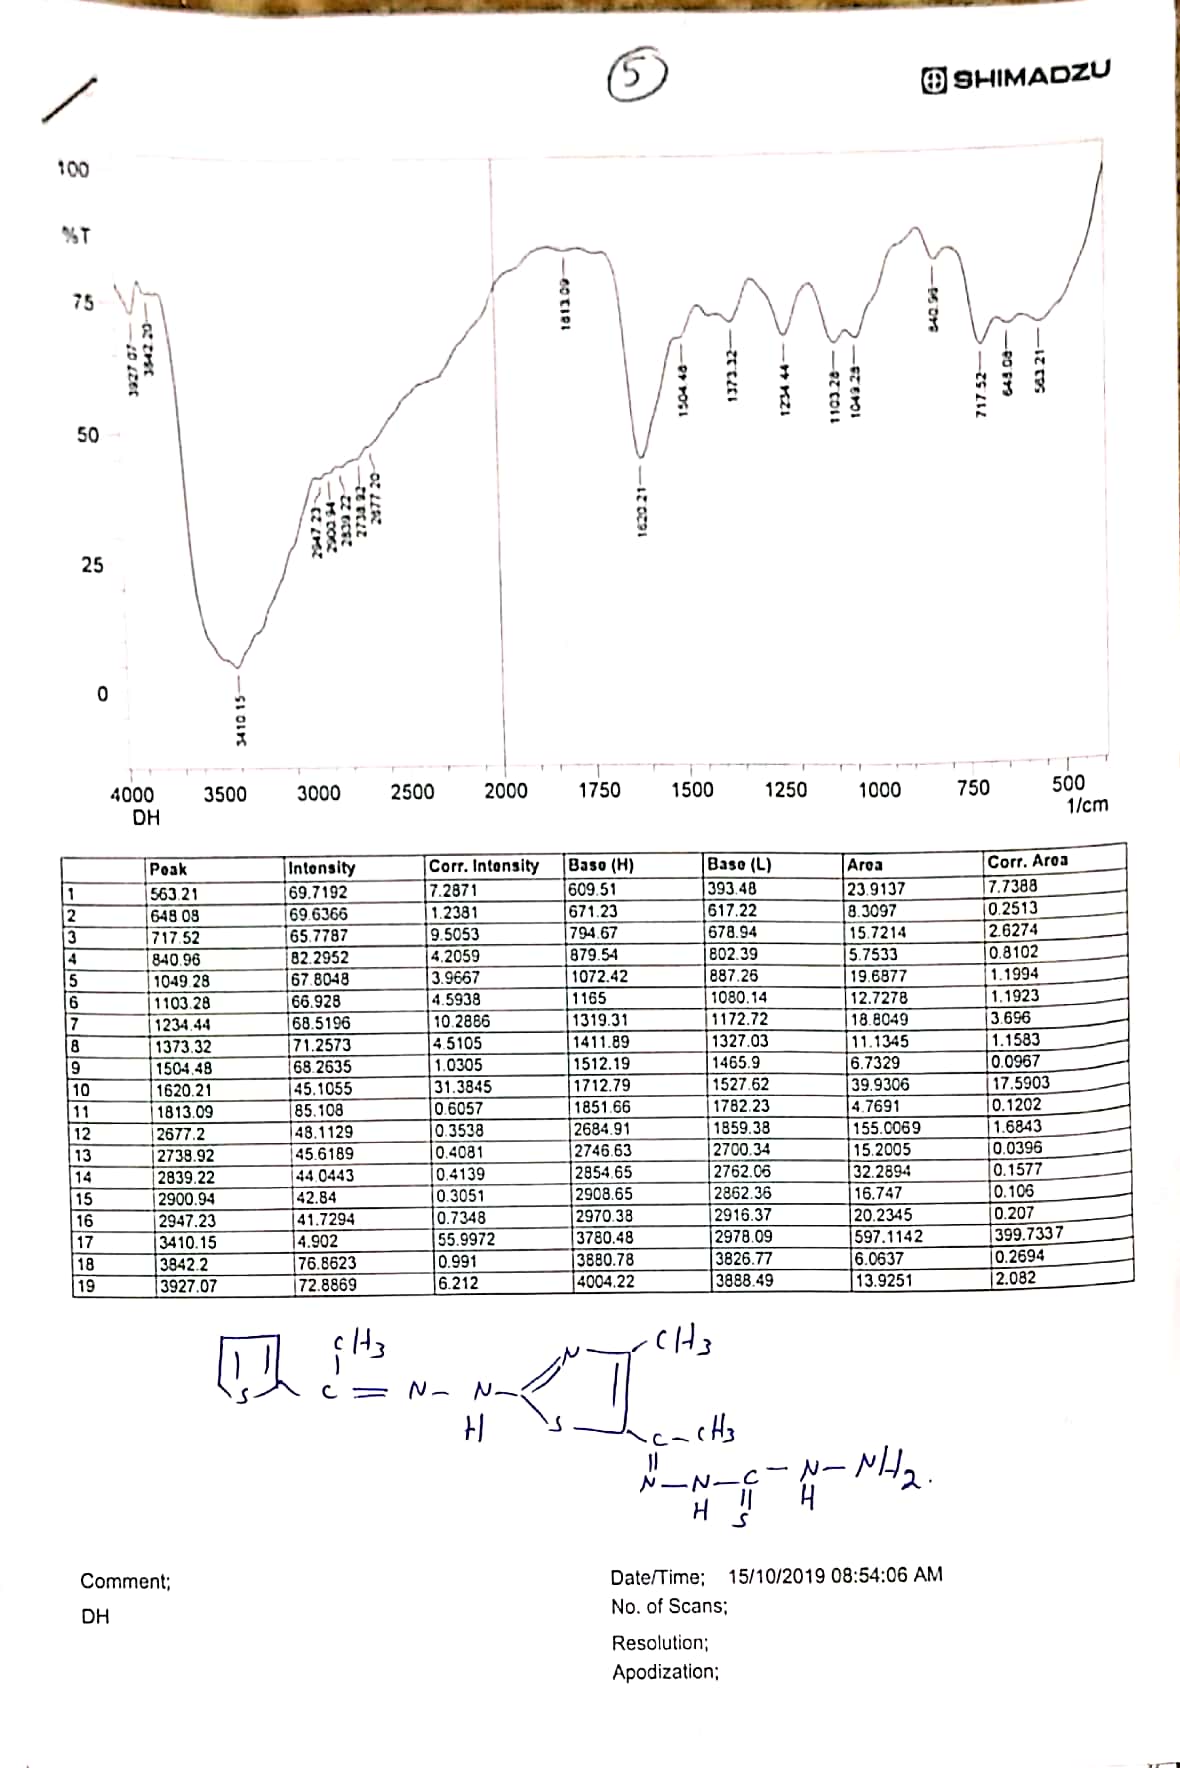
**

**IR of compound 5**

**
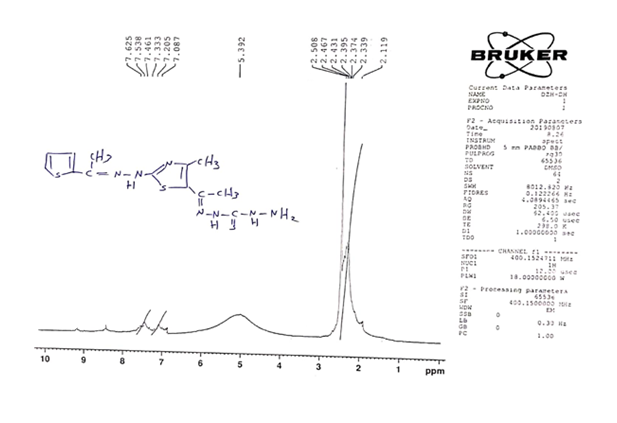
**

**1H-NMR of compound 5**

**
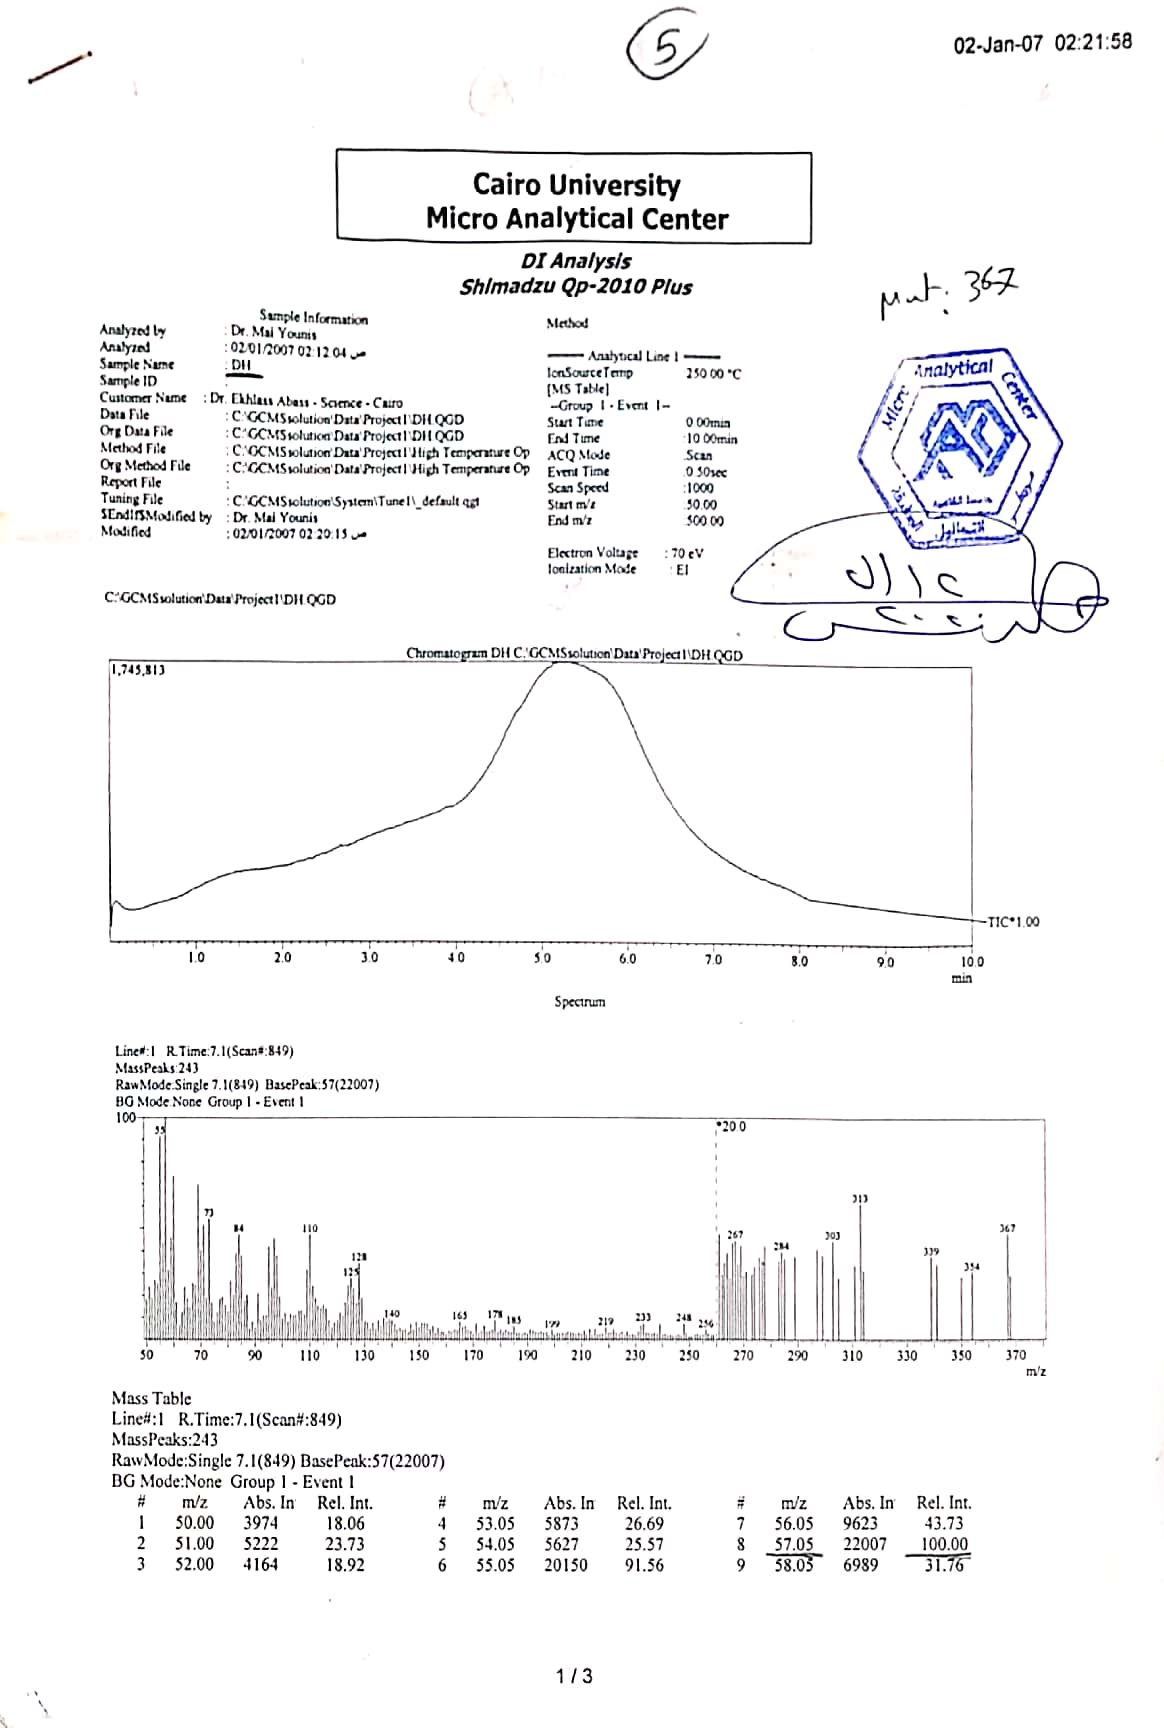
**

**Mass of compound 5**

**
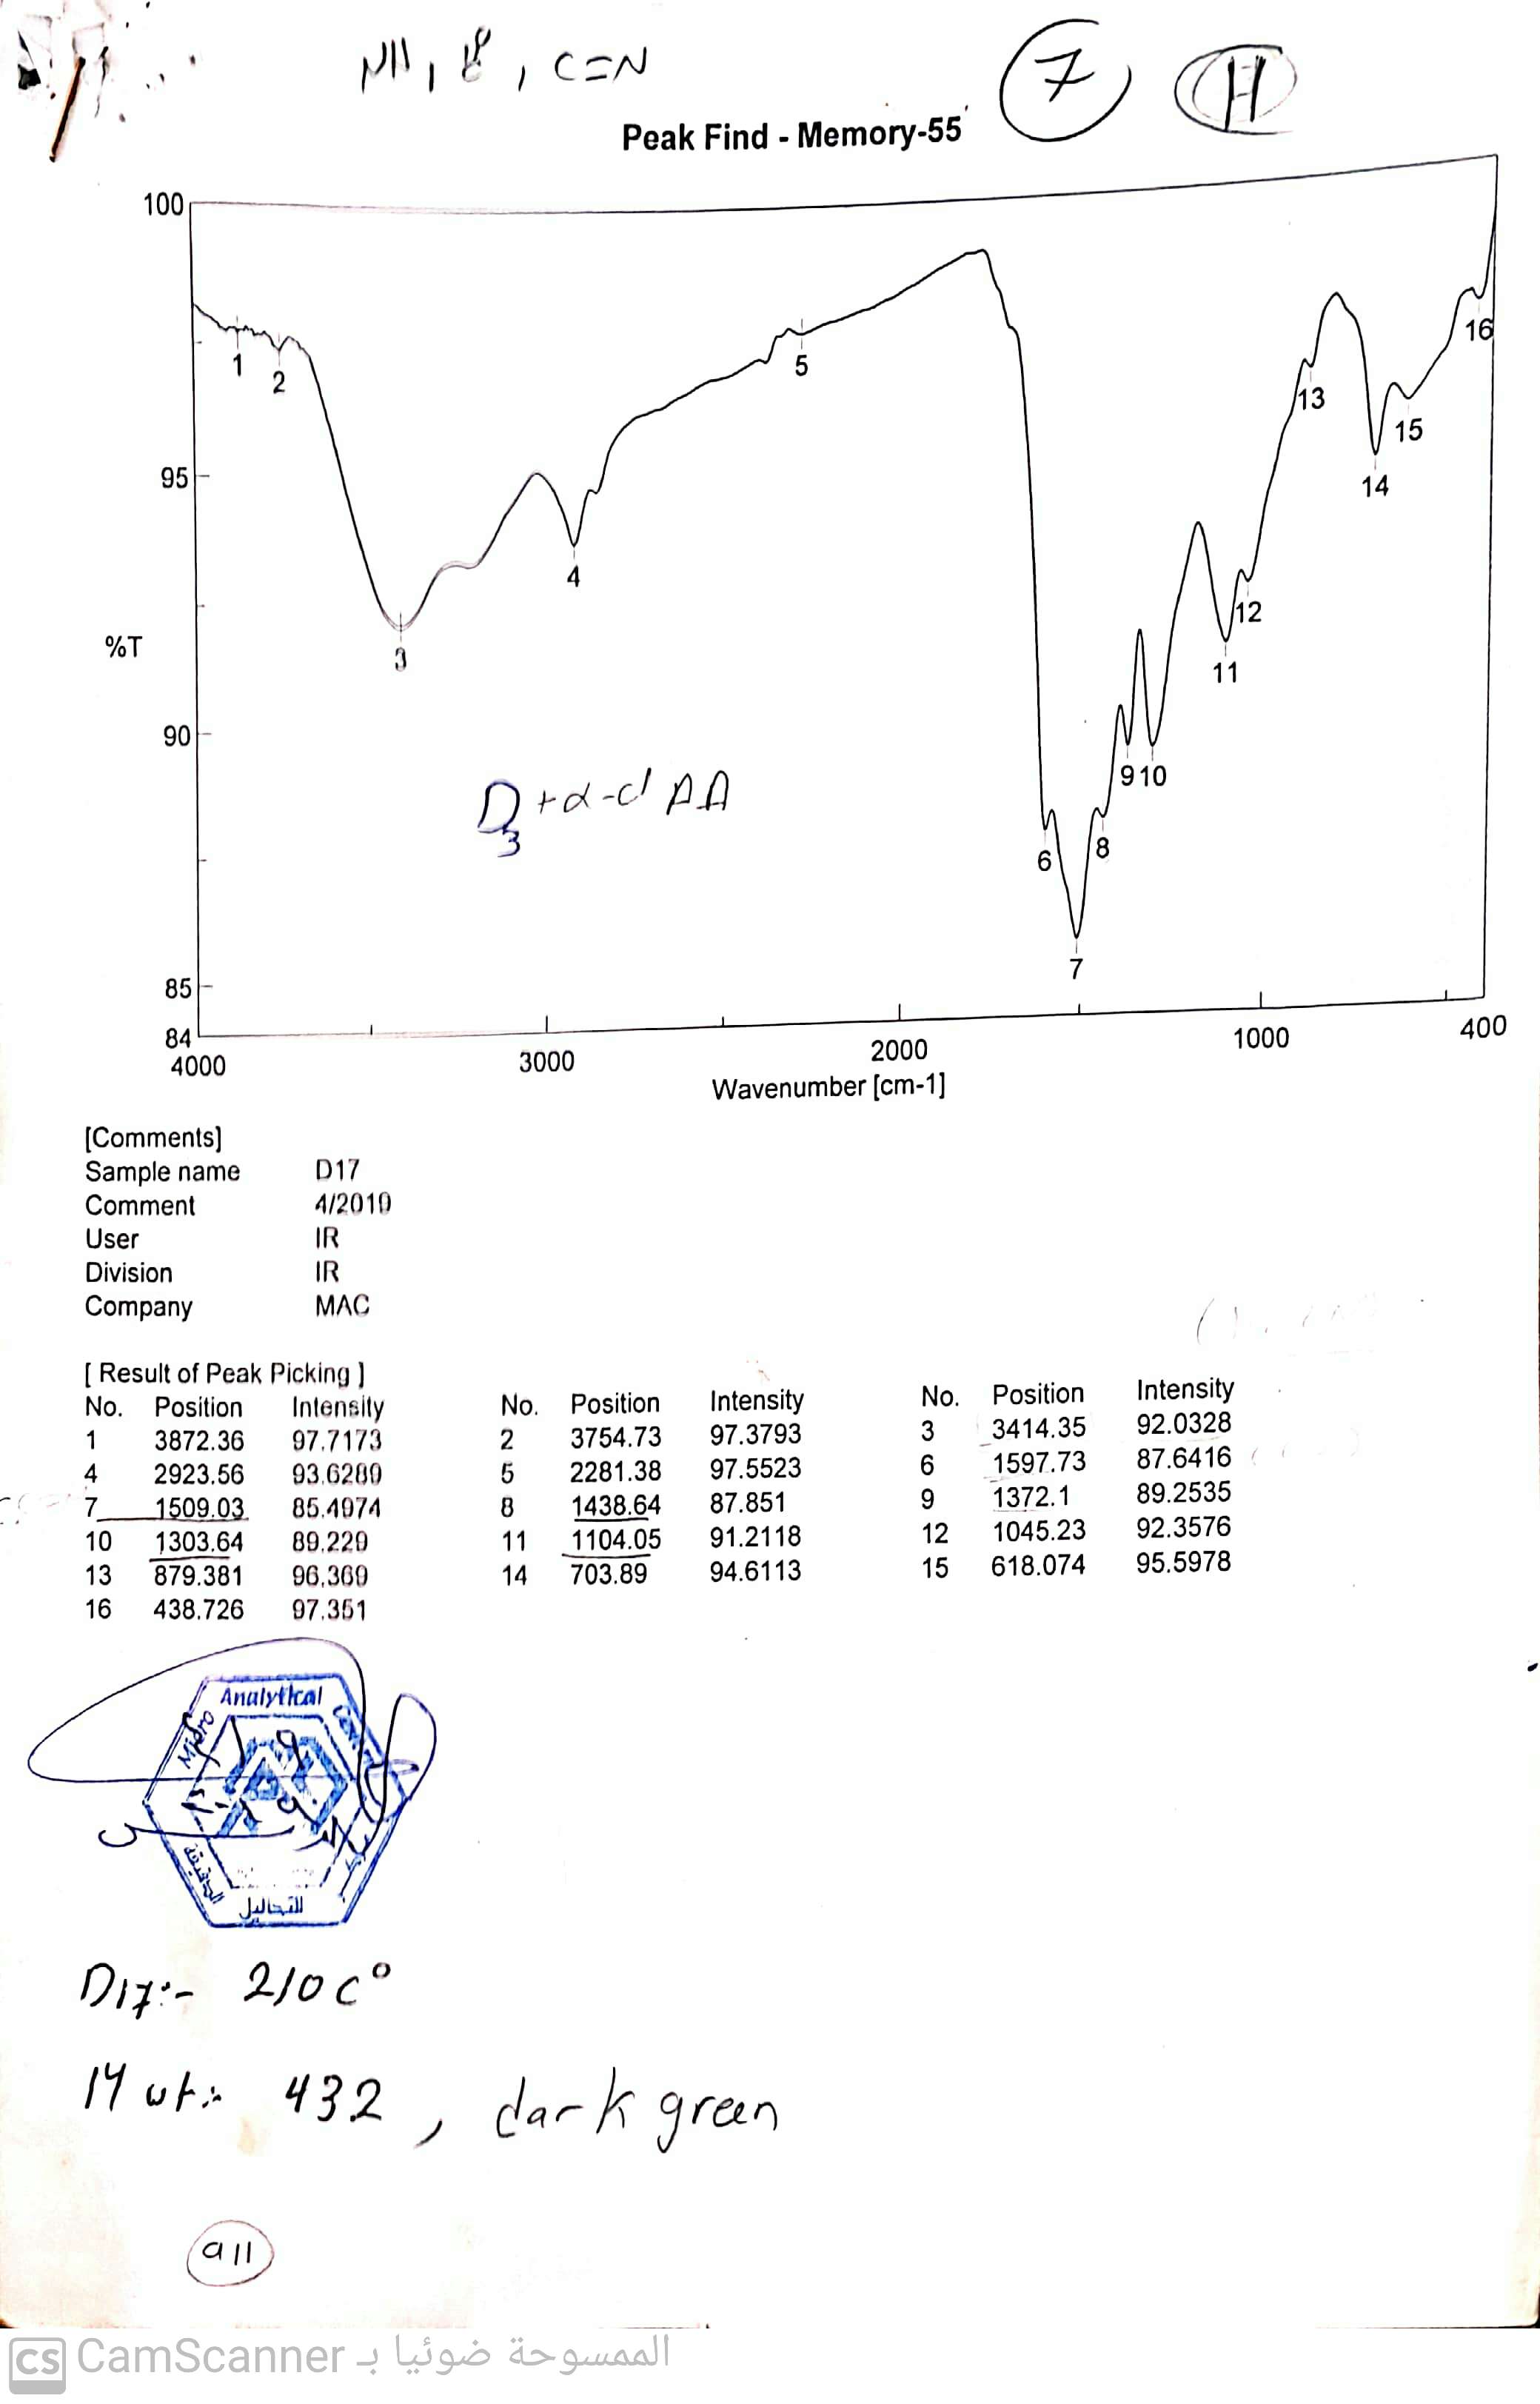
**

**IR of compound 7**

**
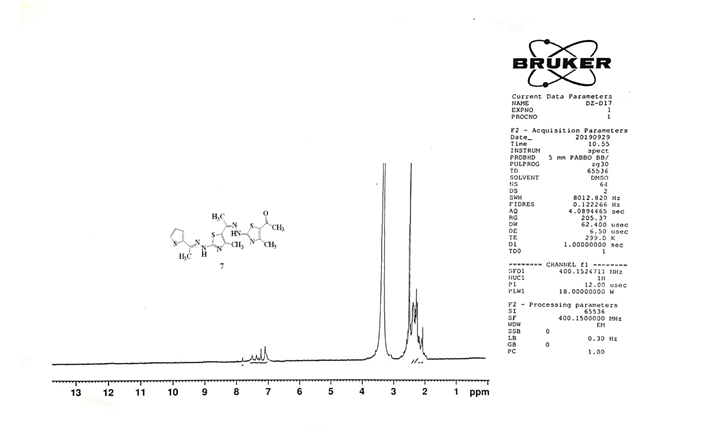
**

**1H-NMR of compound 7**

**
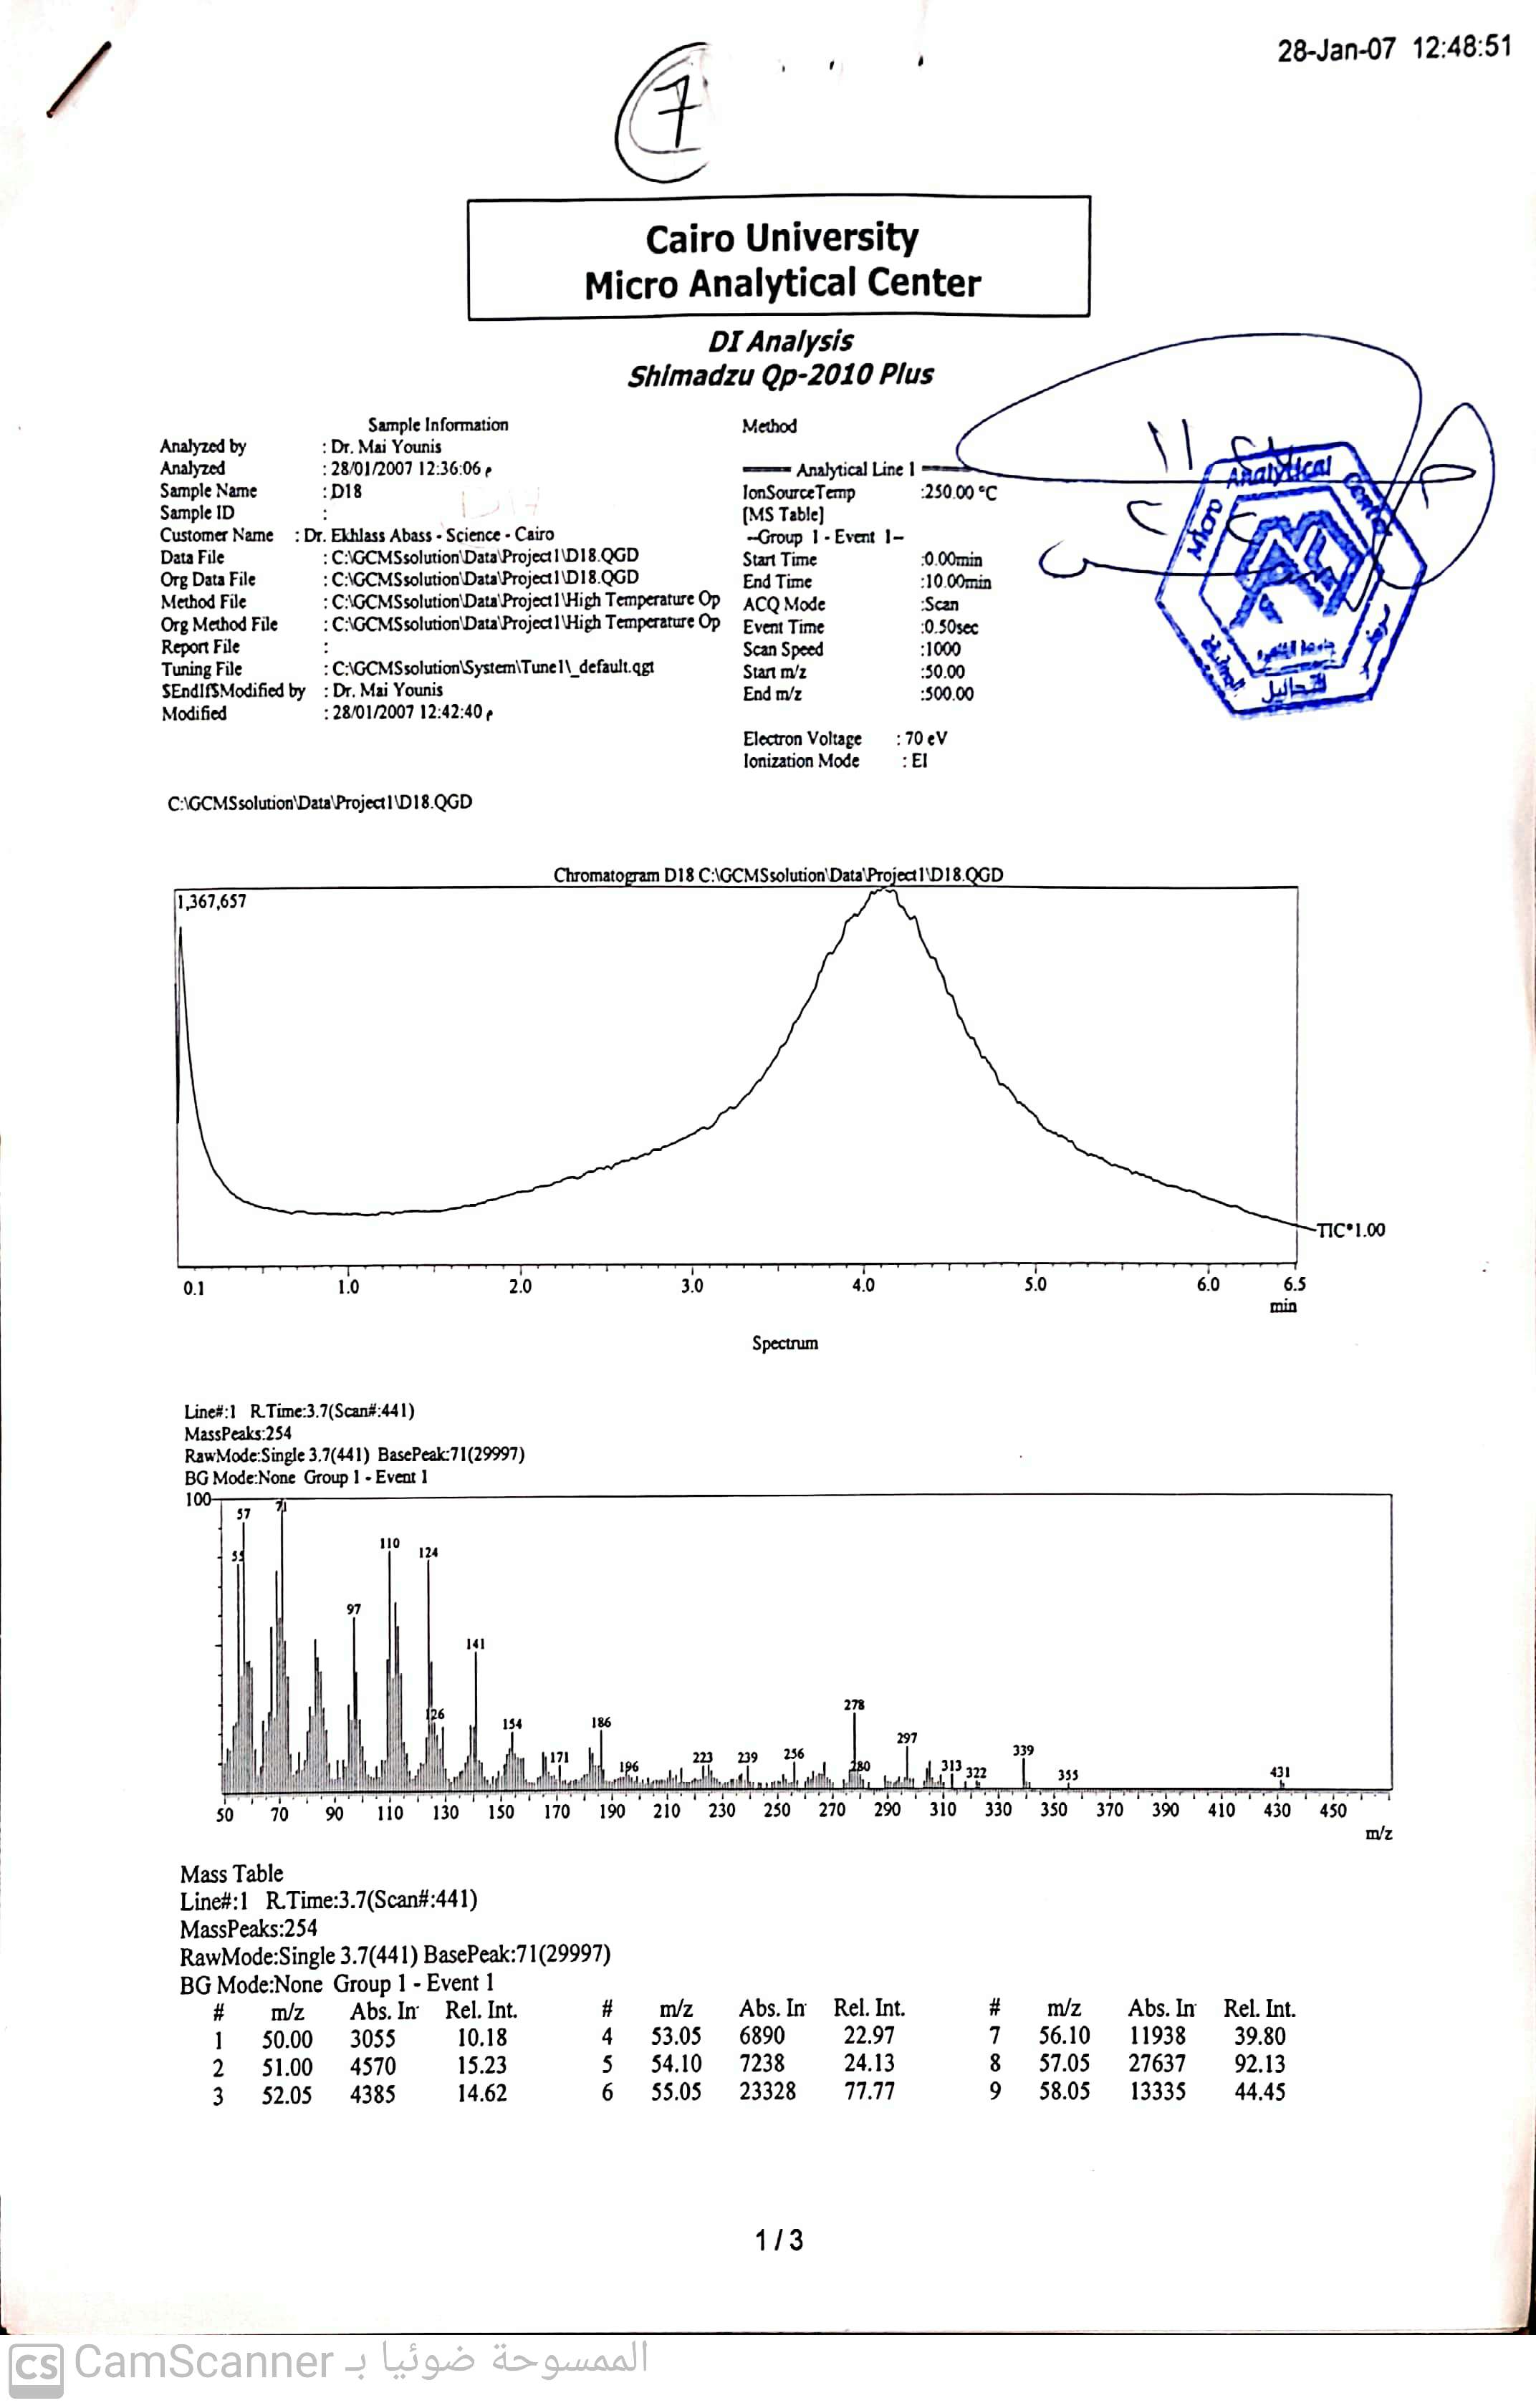
**

**Mass of compound 7**

**
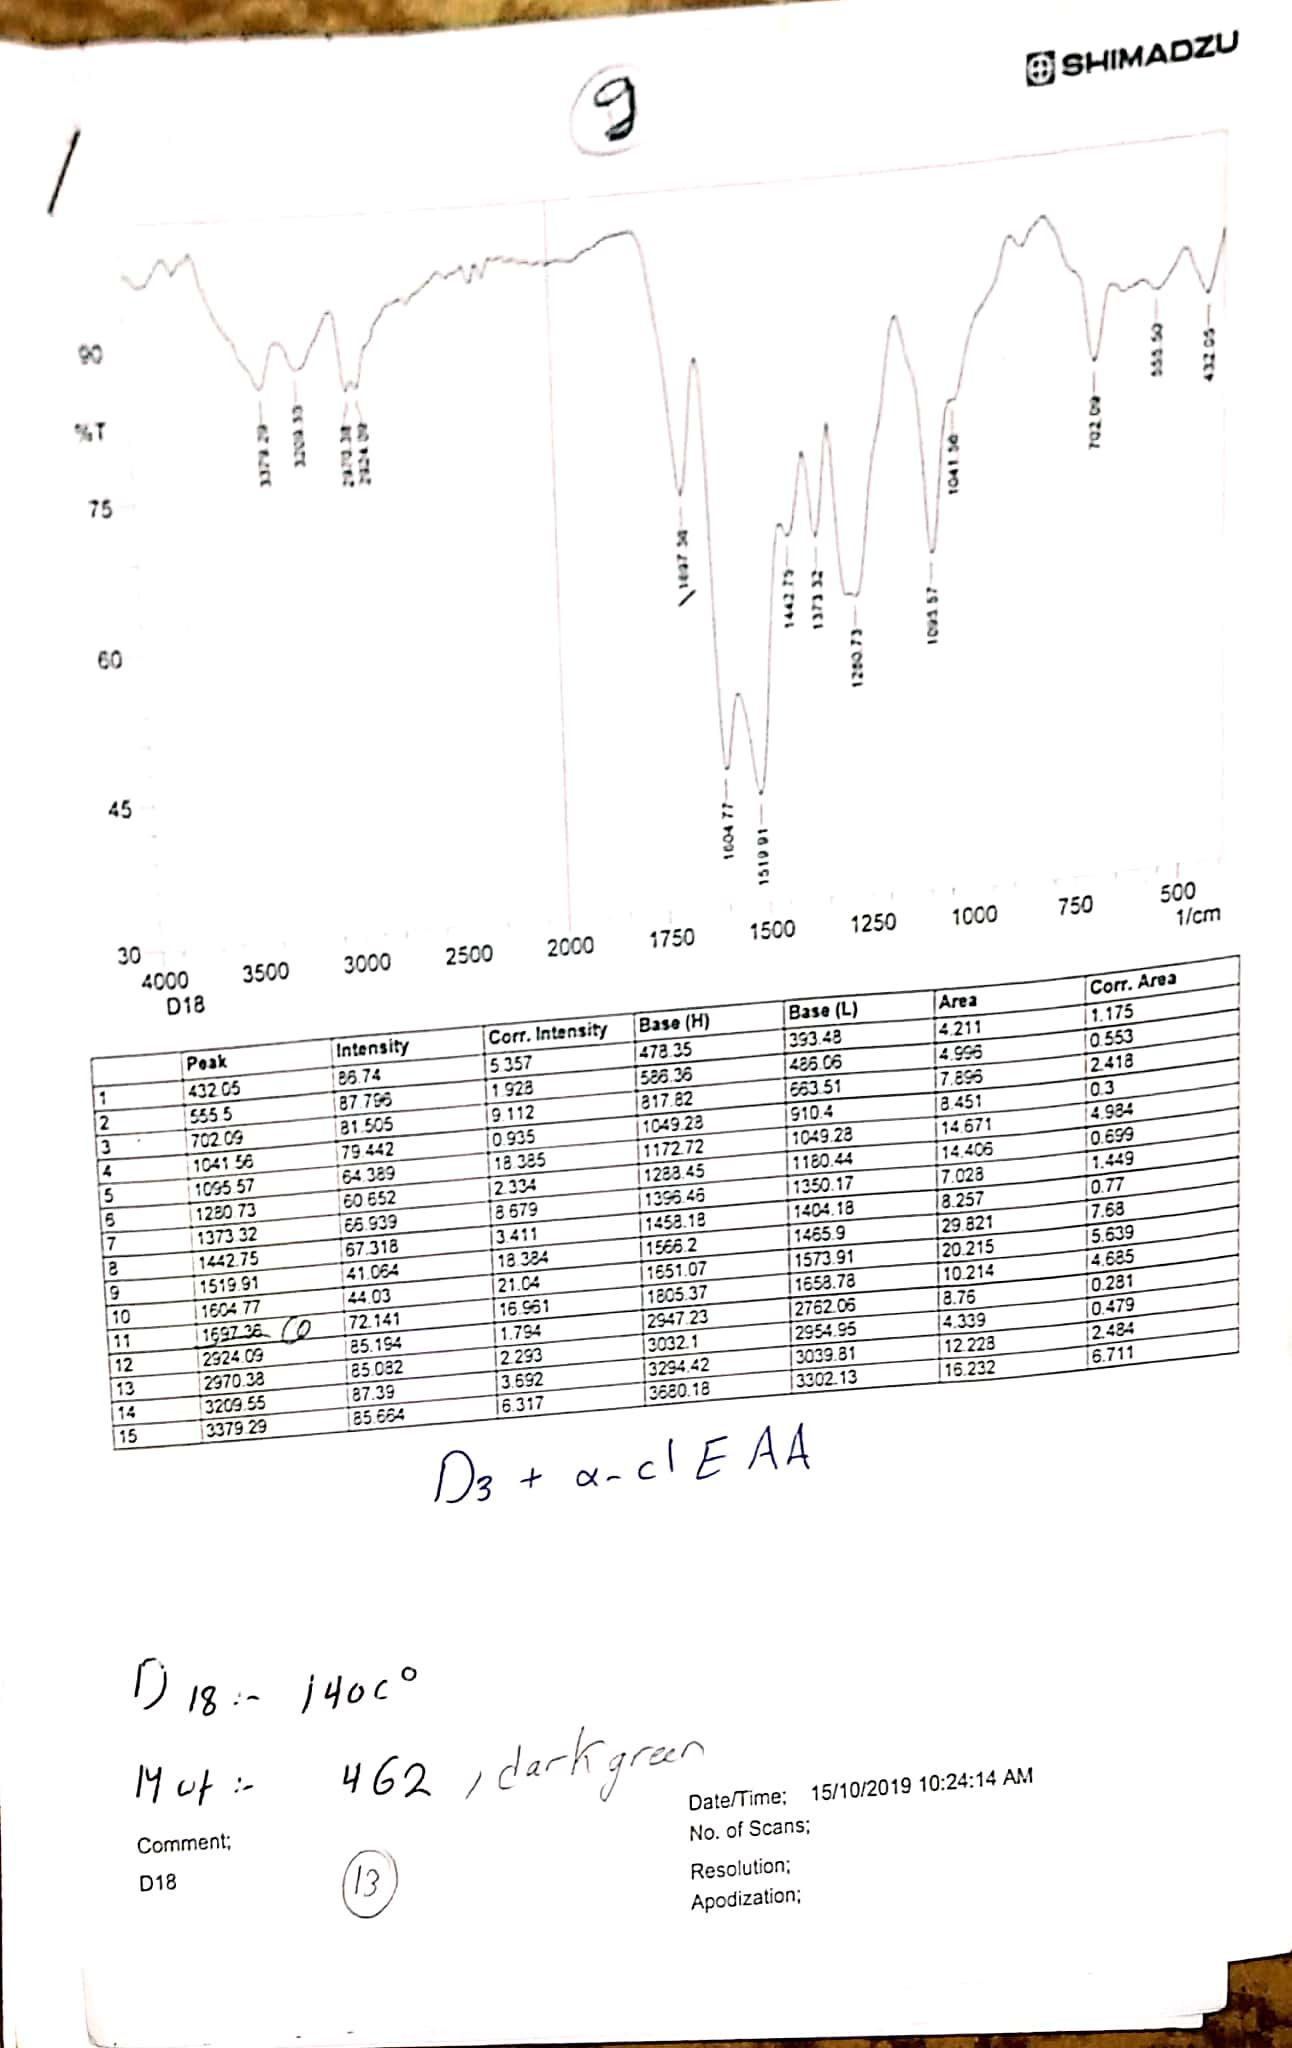
**

**IR of compound 9**

**
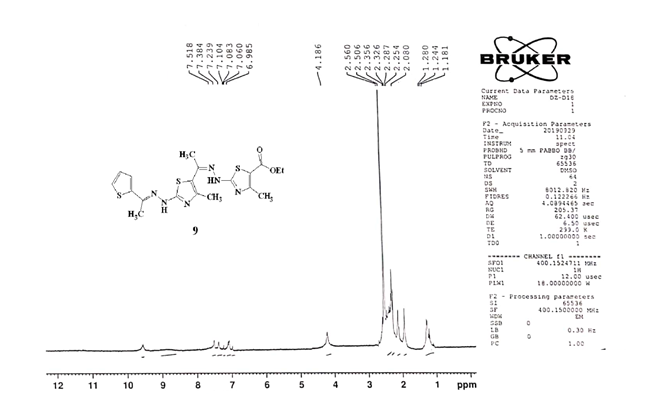
**

**1H-NMR of compound 9**

**
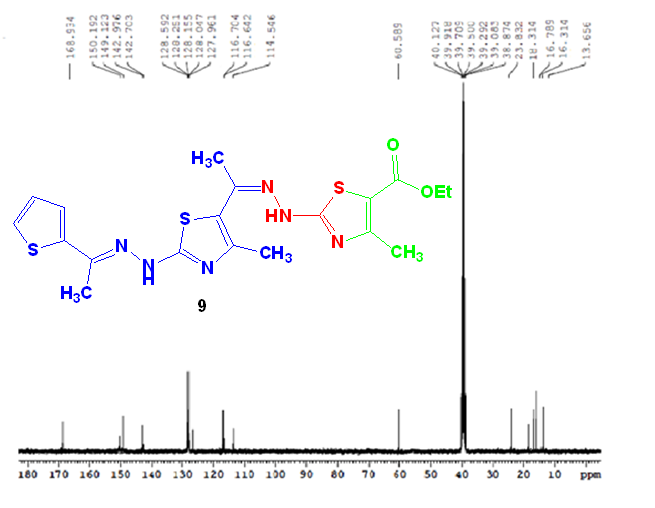
**

**13C-NMR of compound 9**

**
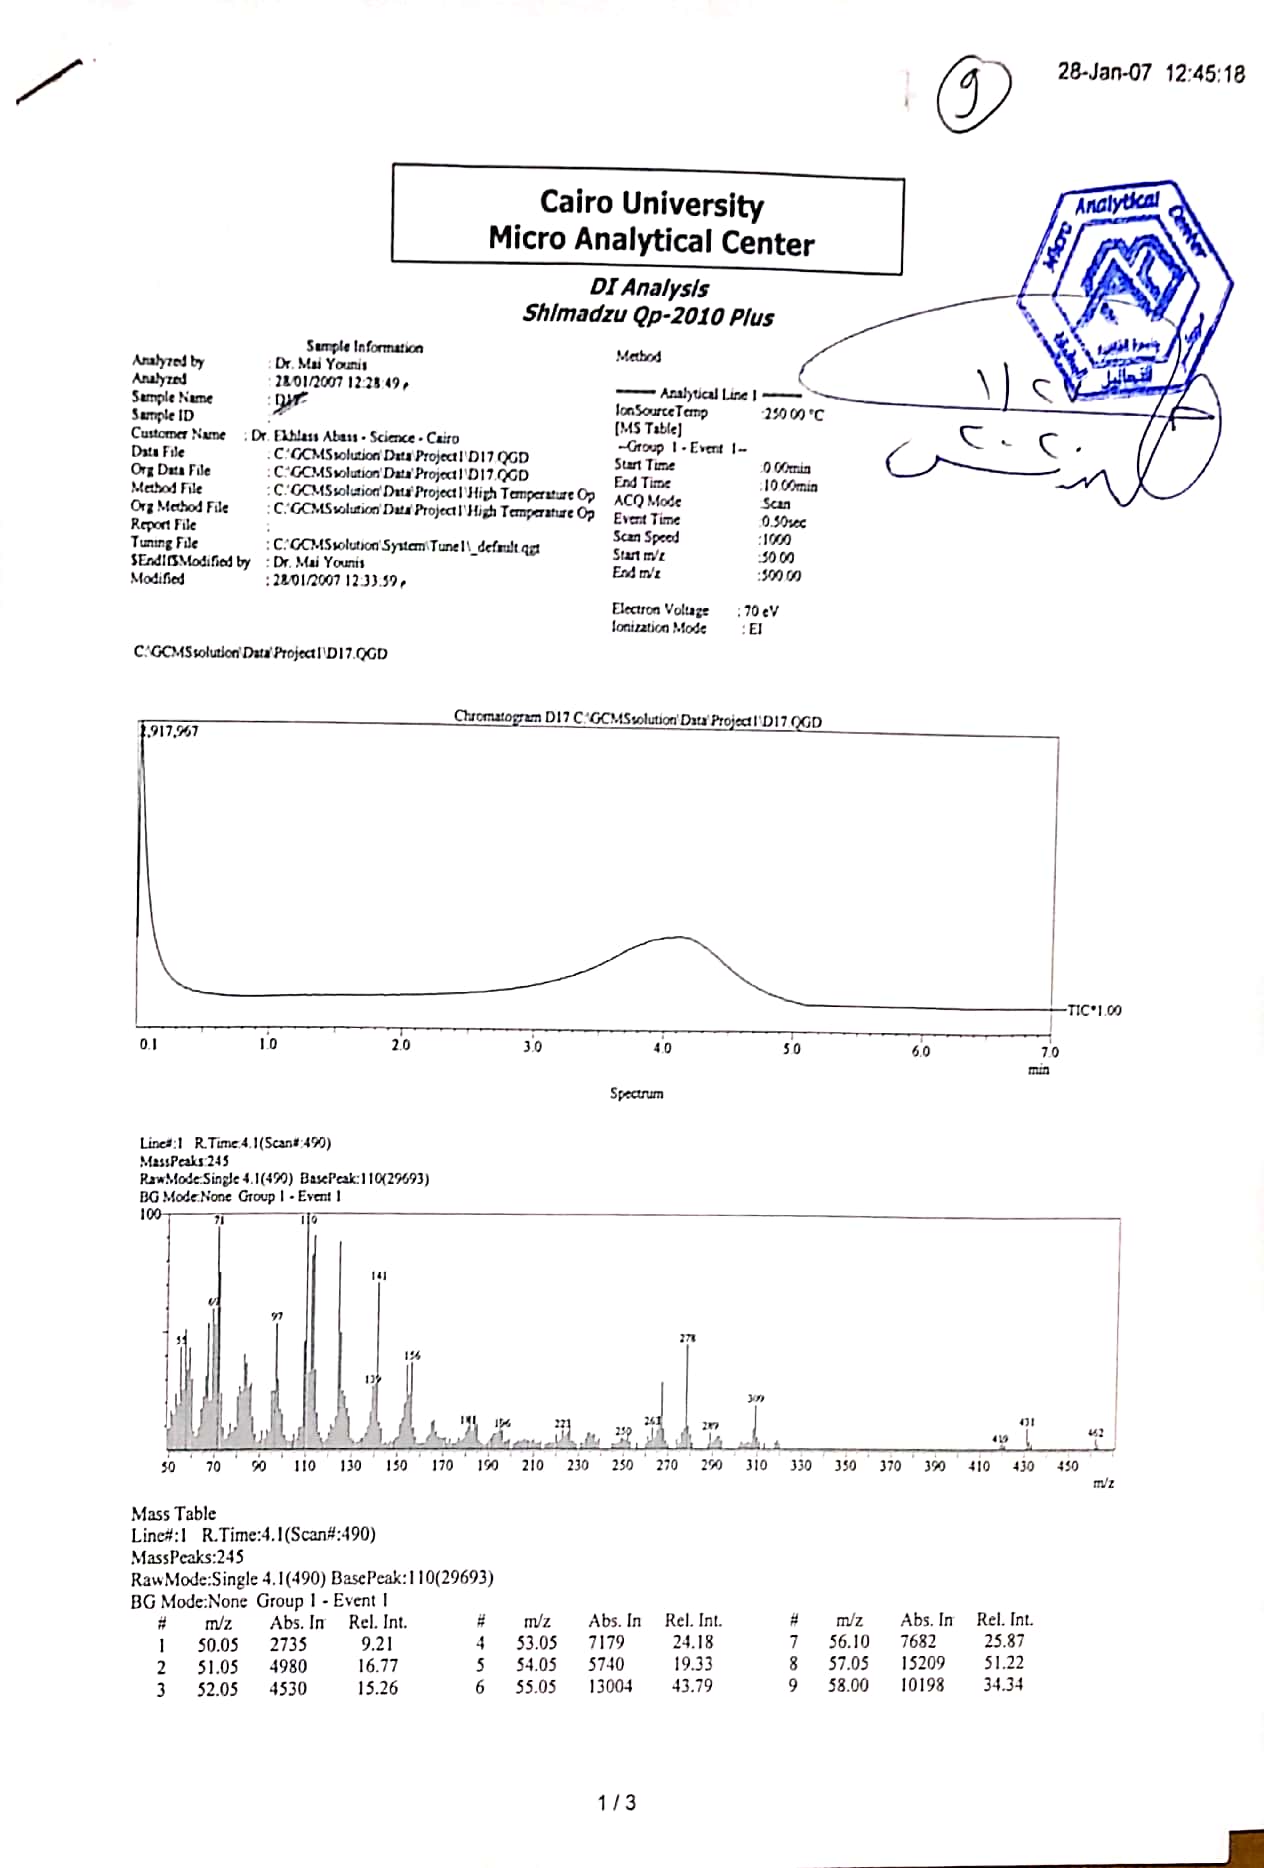
**

**Mass of compound 9**

**
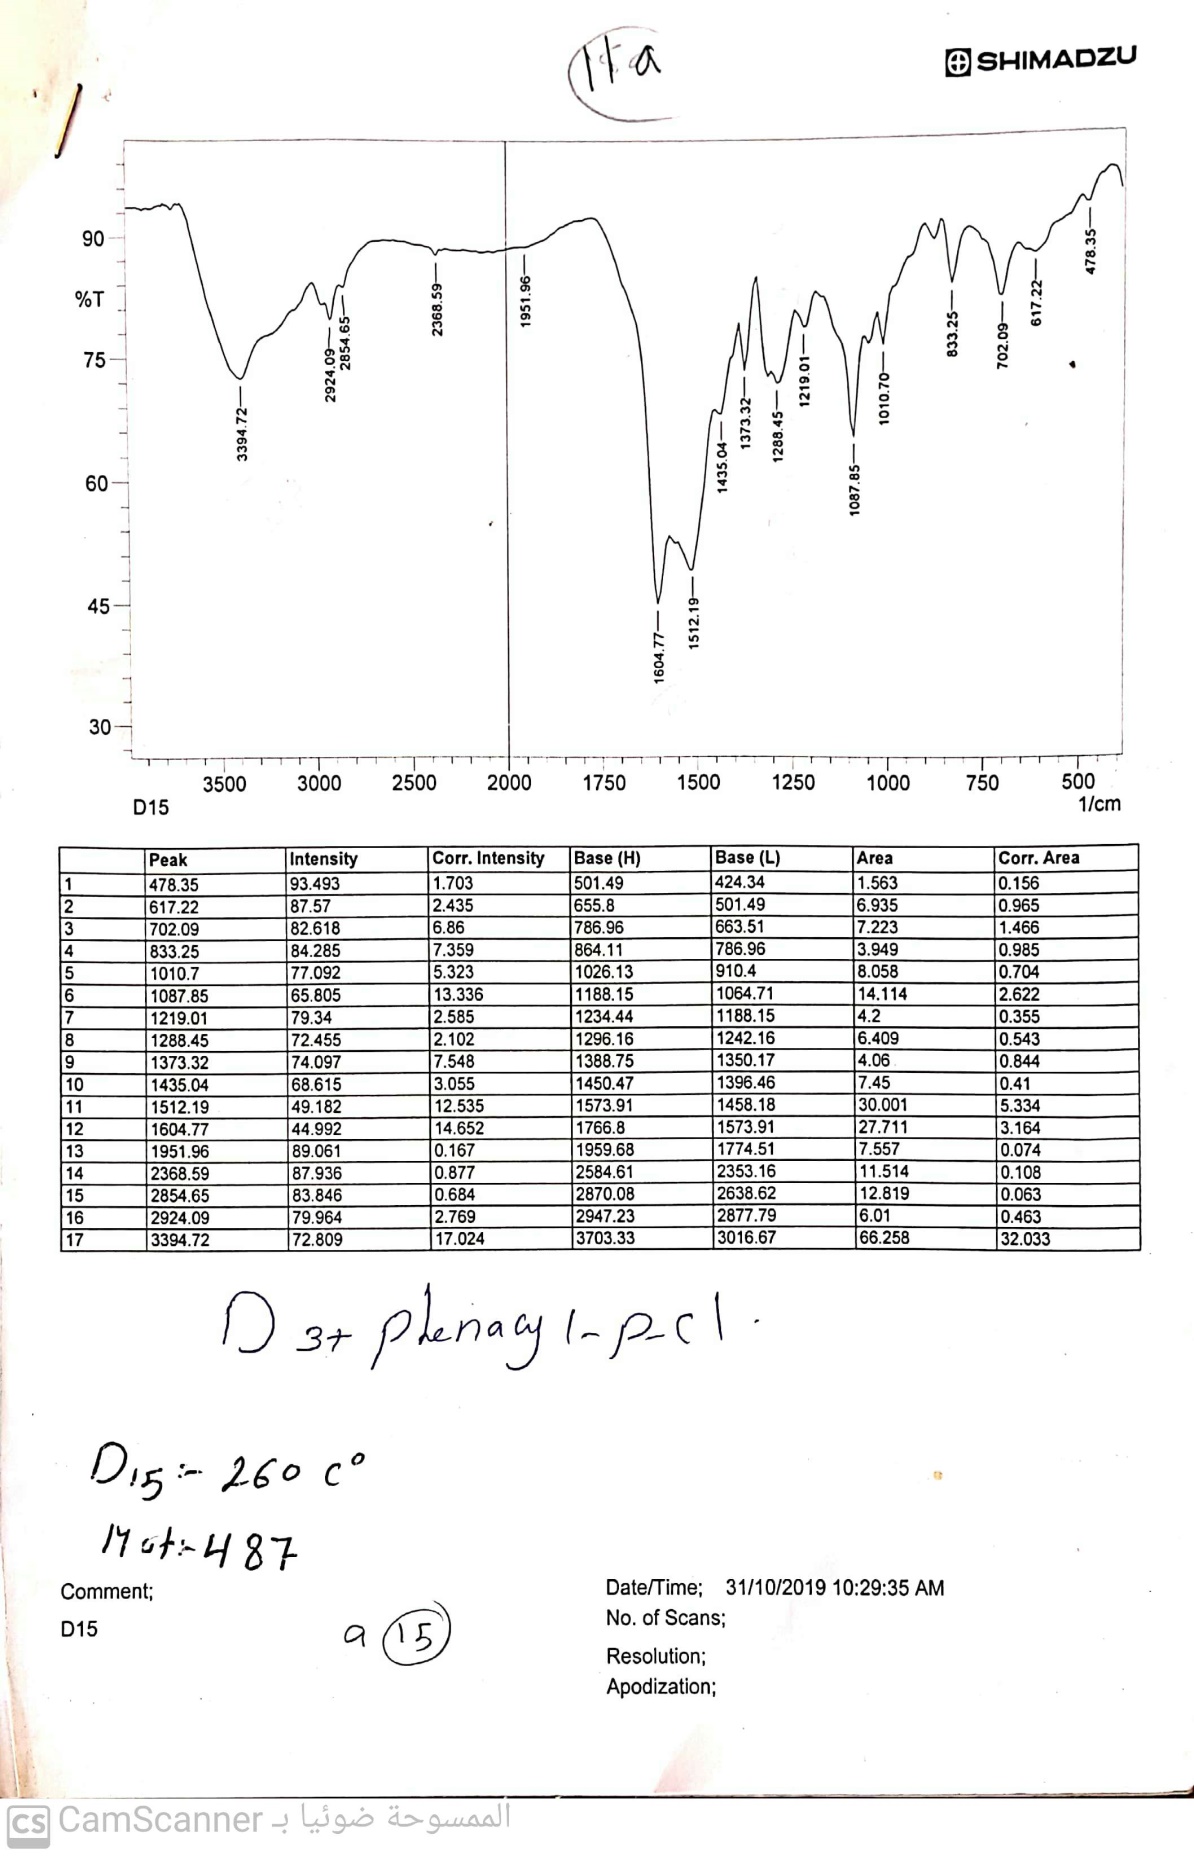
**

**IR of compound 11a**

**
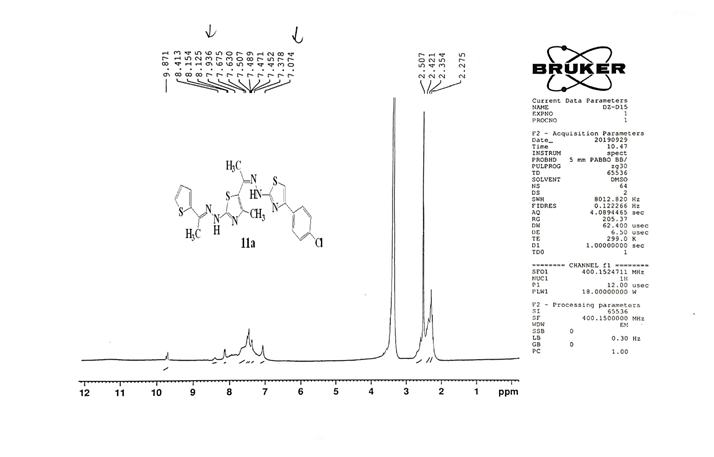
**

**1H-NMR of compound 11a**

**
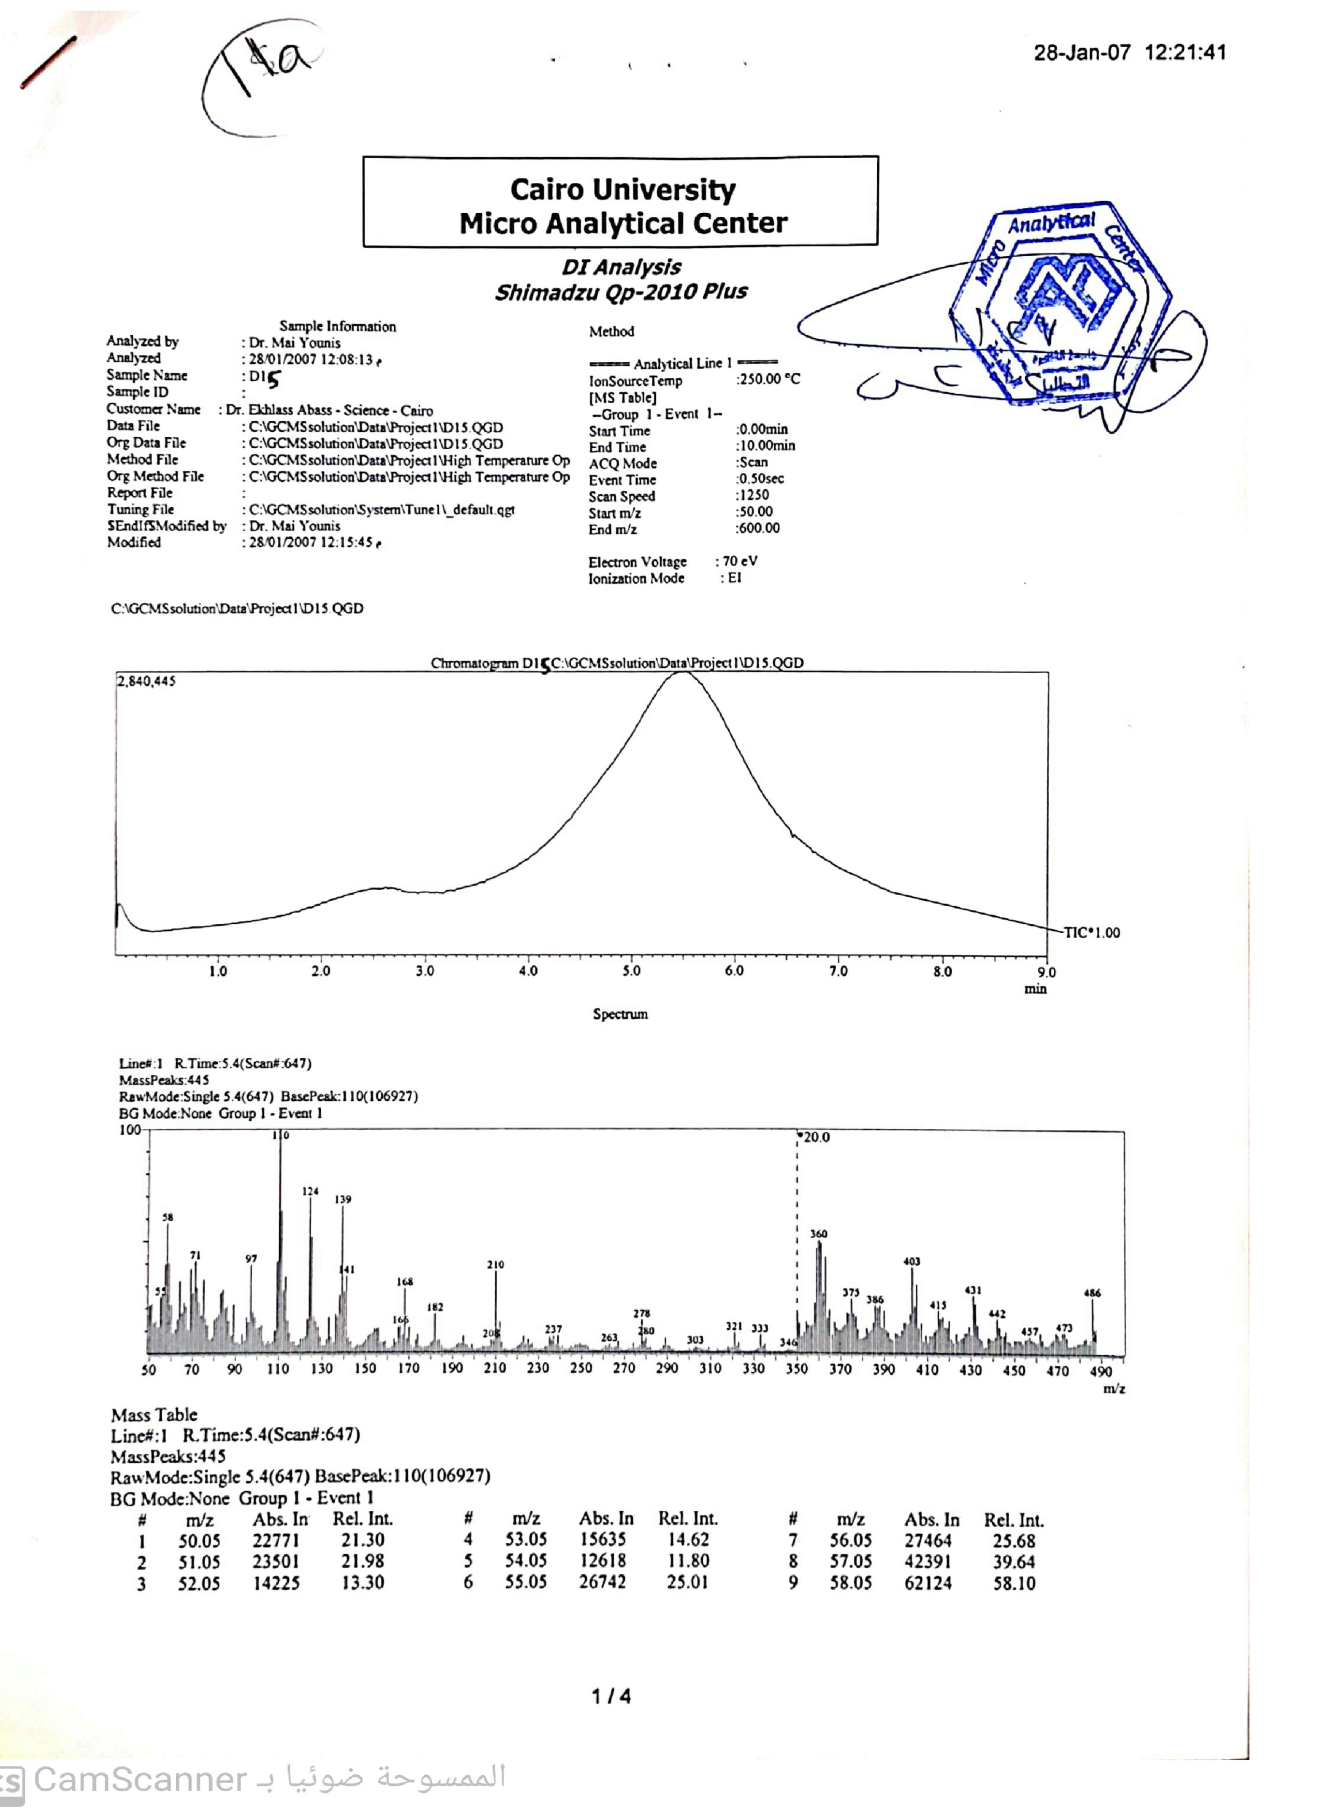
**

**Mass of compound 11a**

**
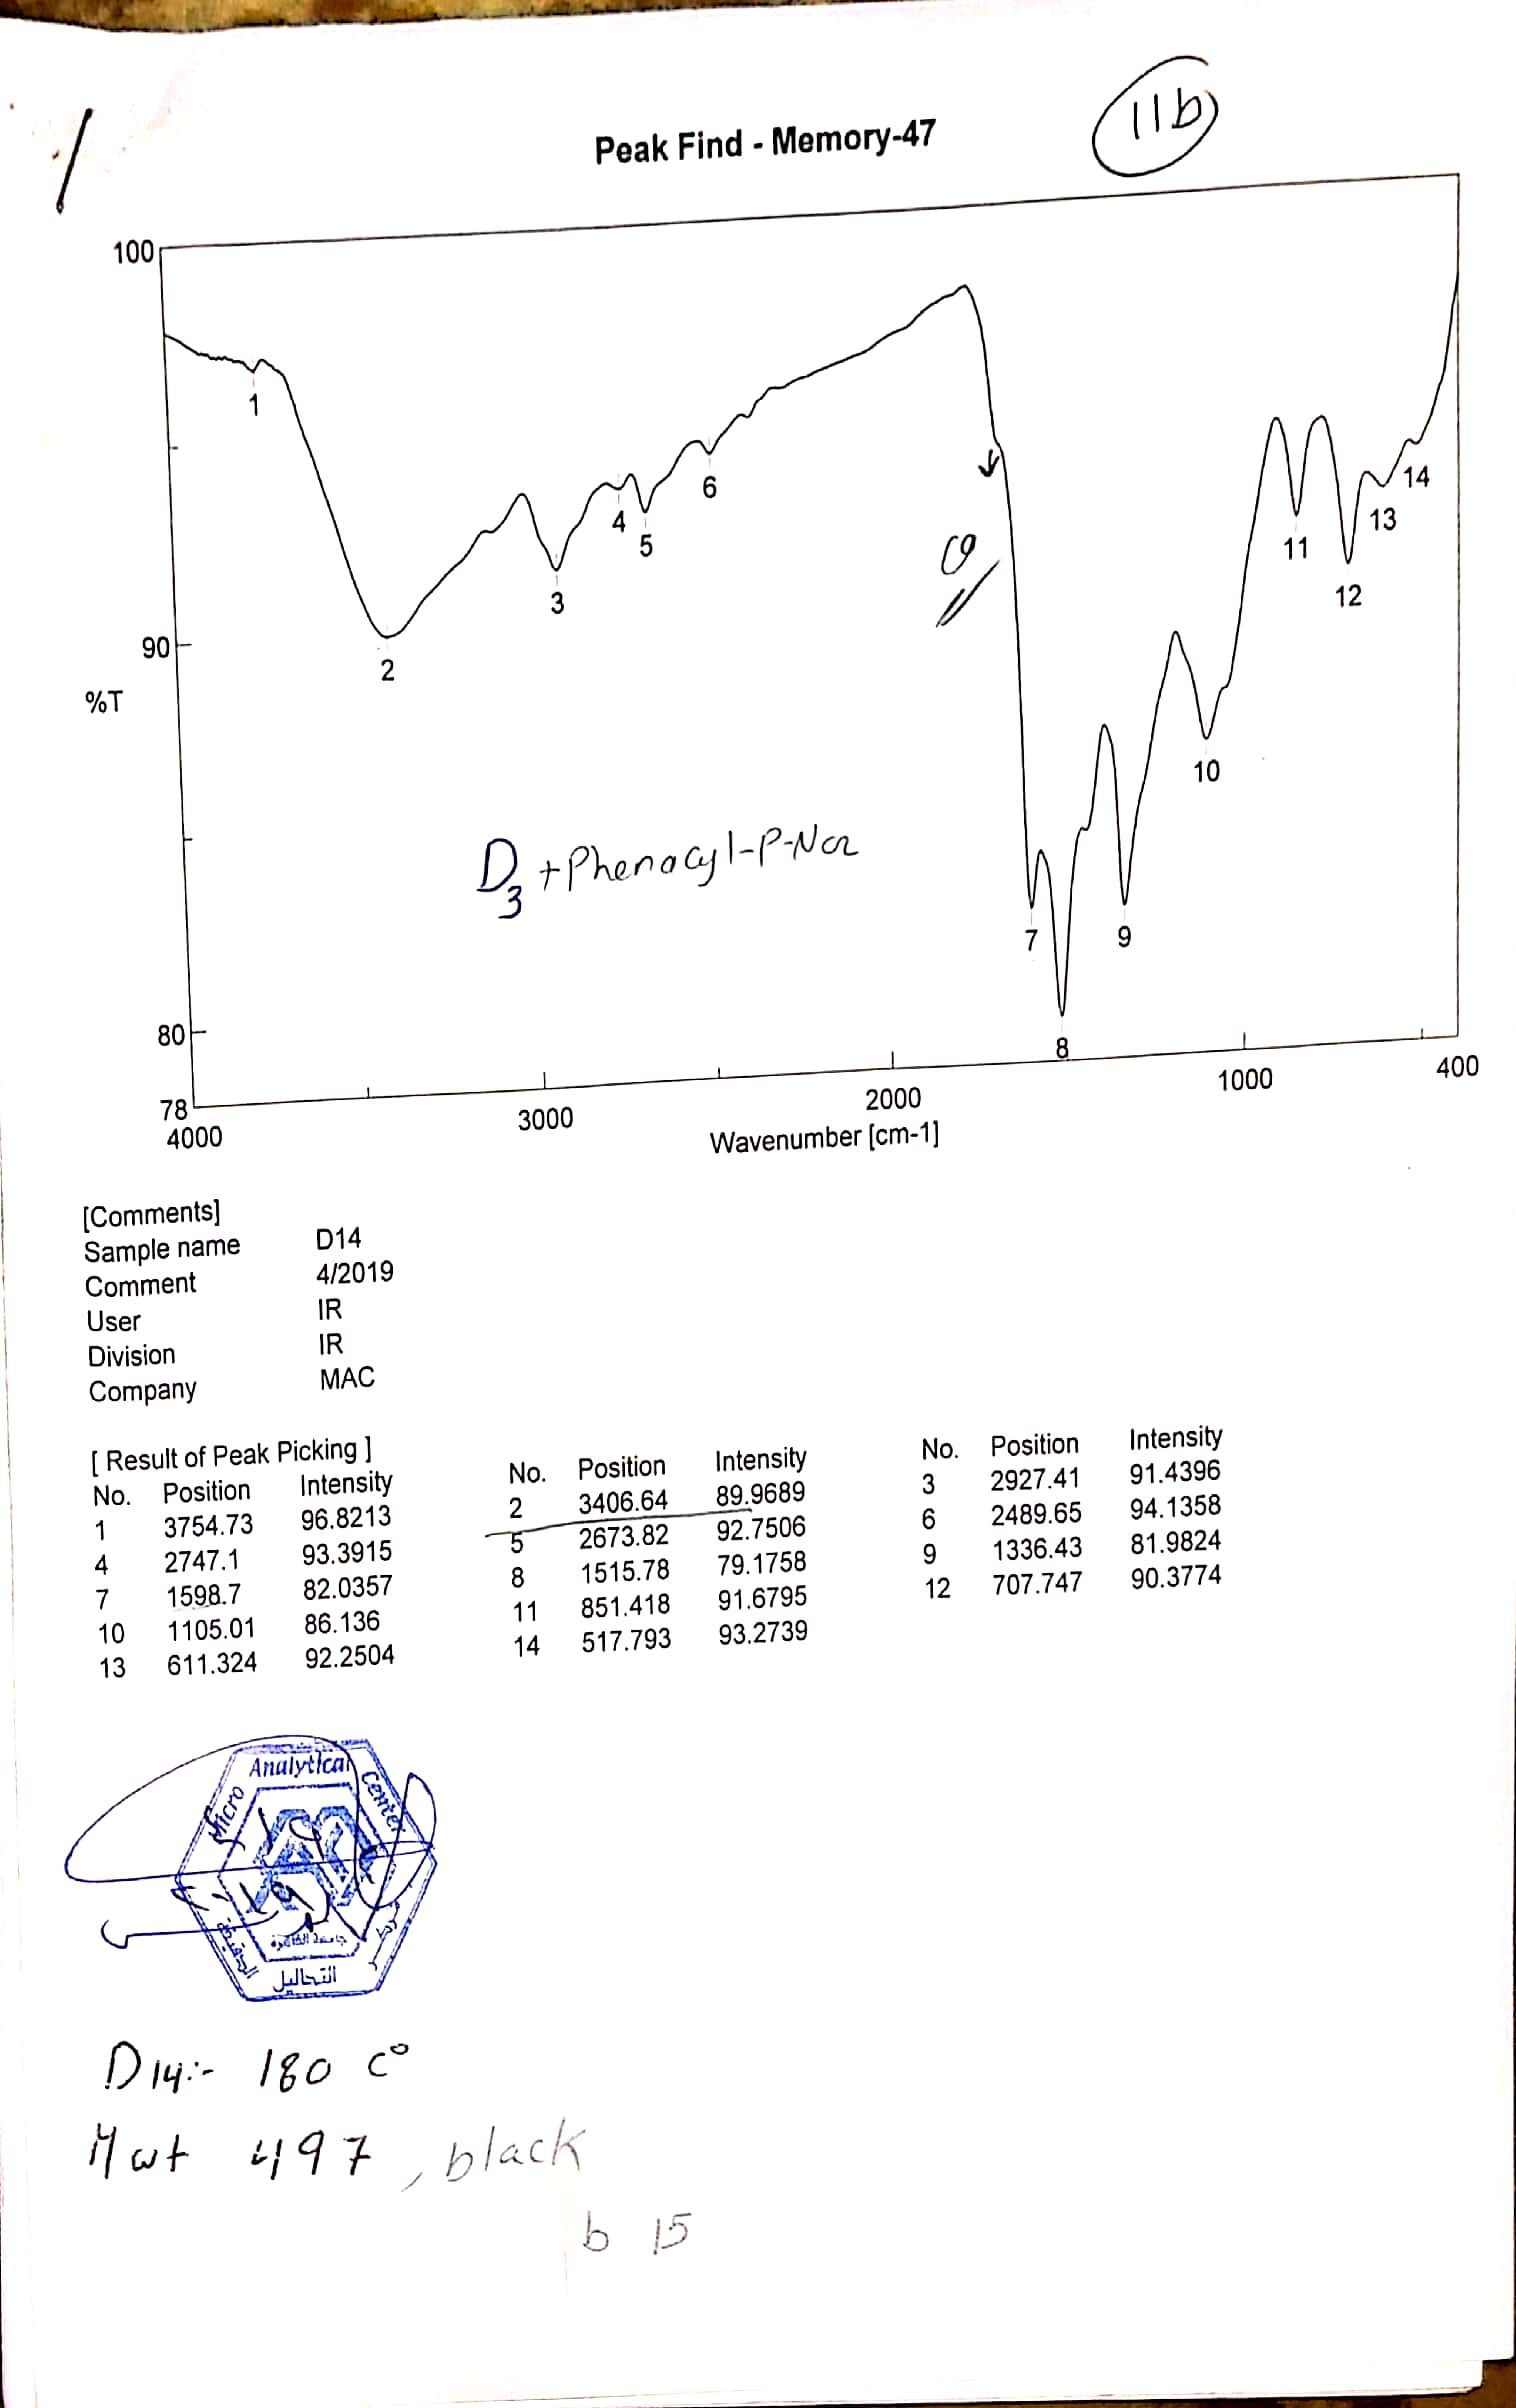
**

**IR of compound 11b**

**
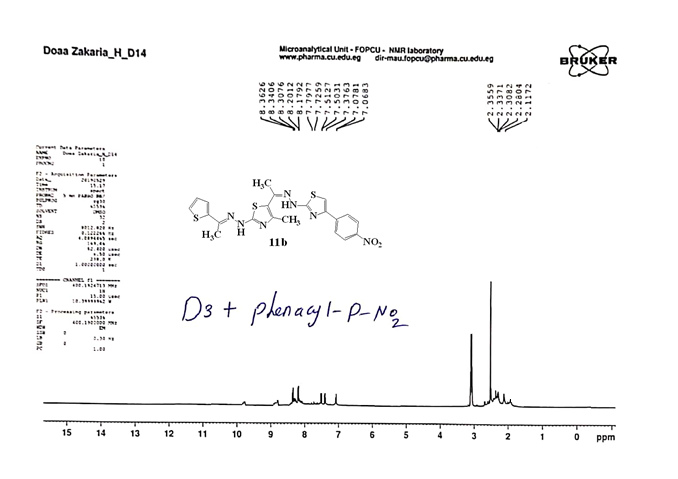
**

**1H-NMR of compound 11b**

**
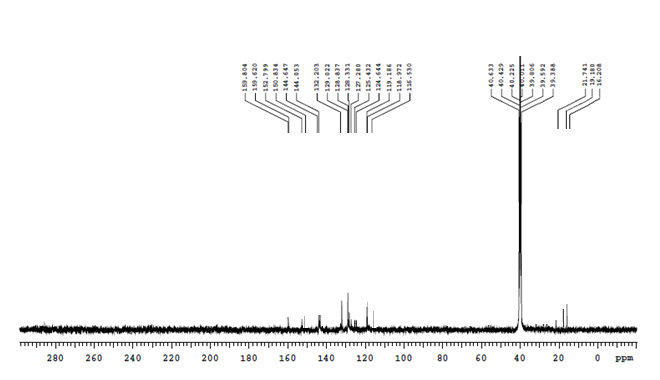
**

**13C-NMR of compound 11b**

**
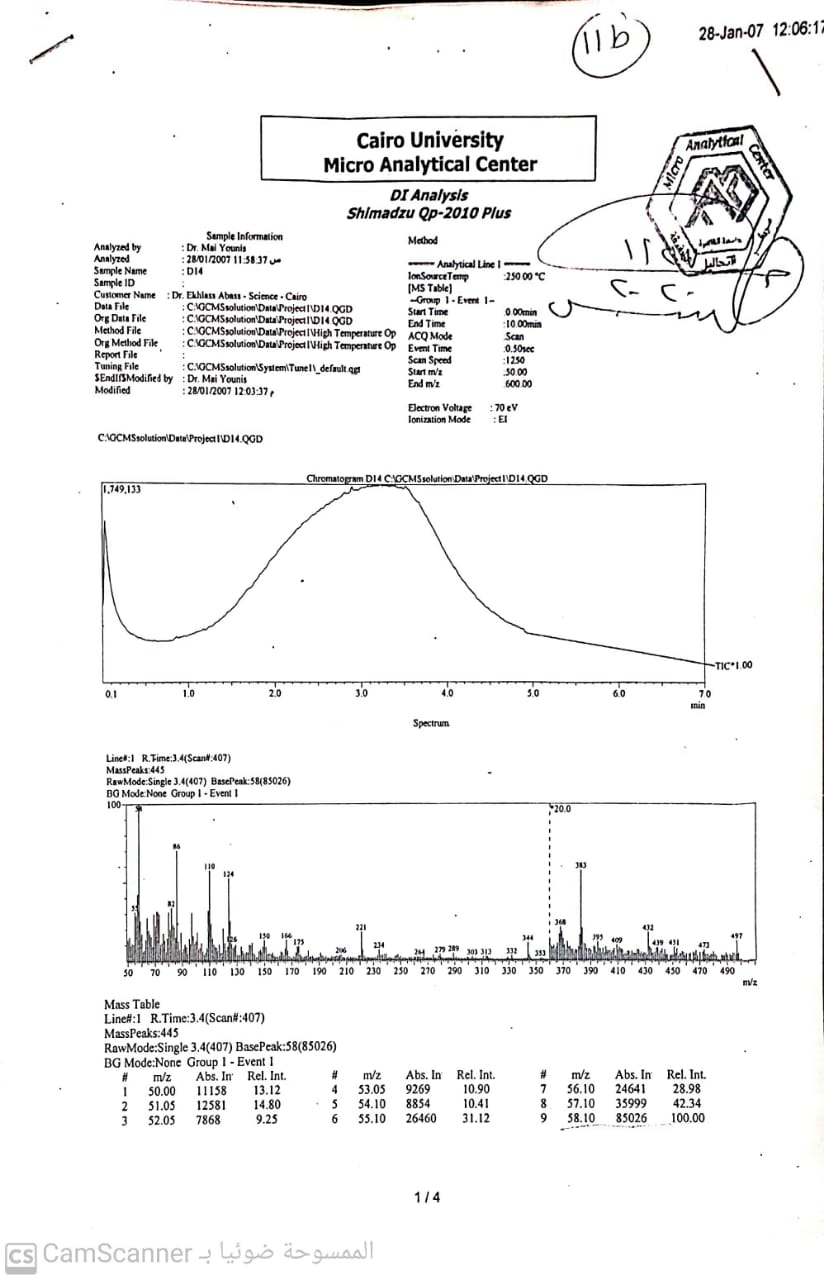
**

**Mass of compound 11b**

**
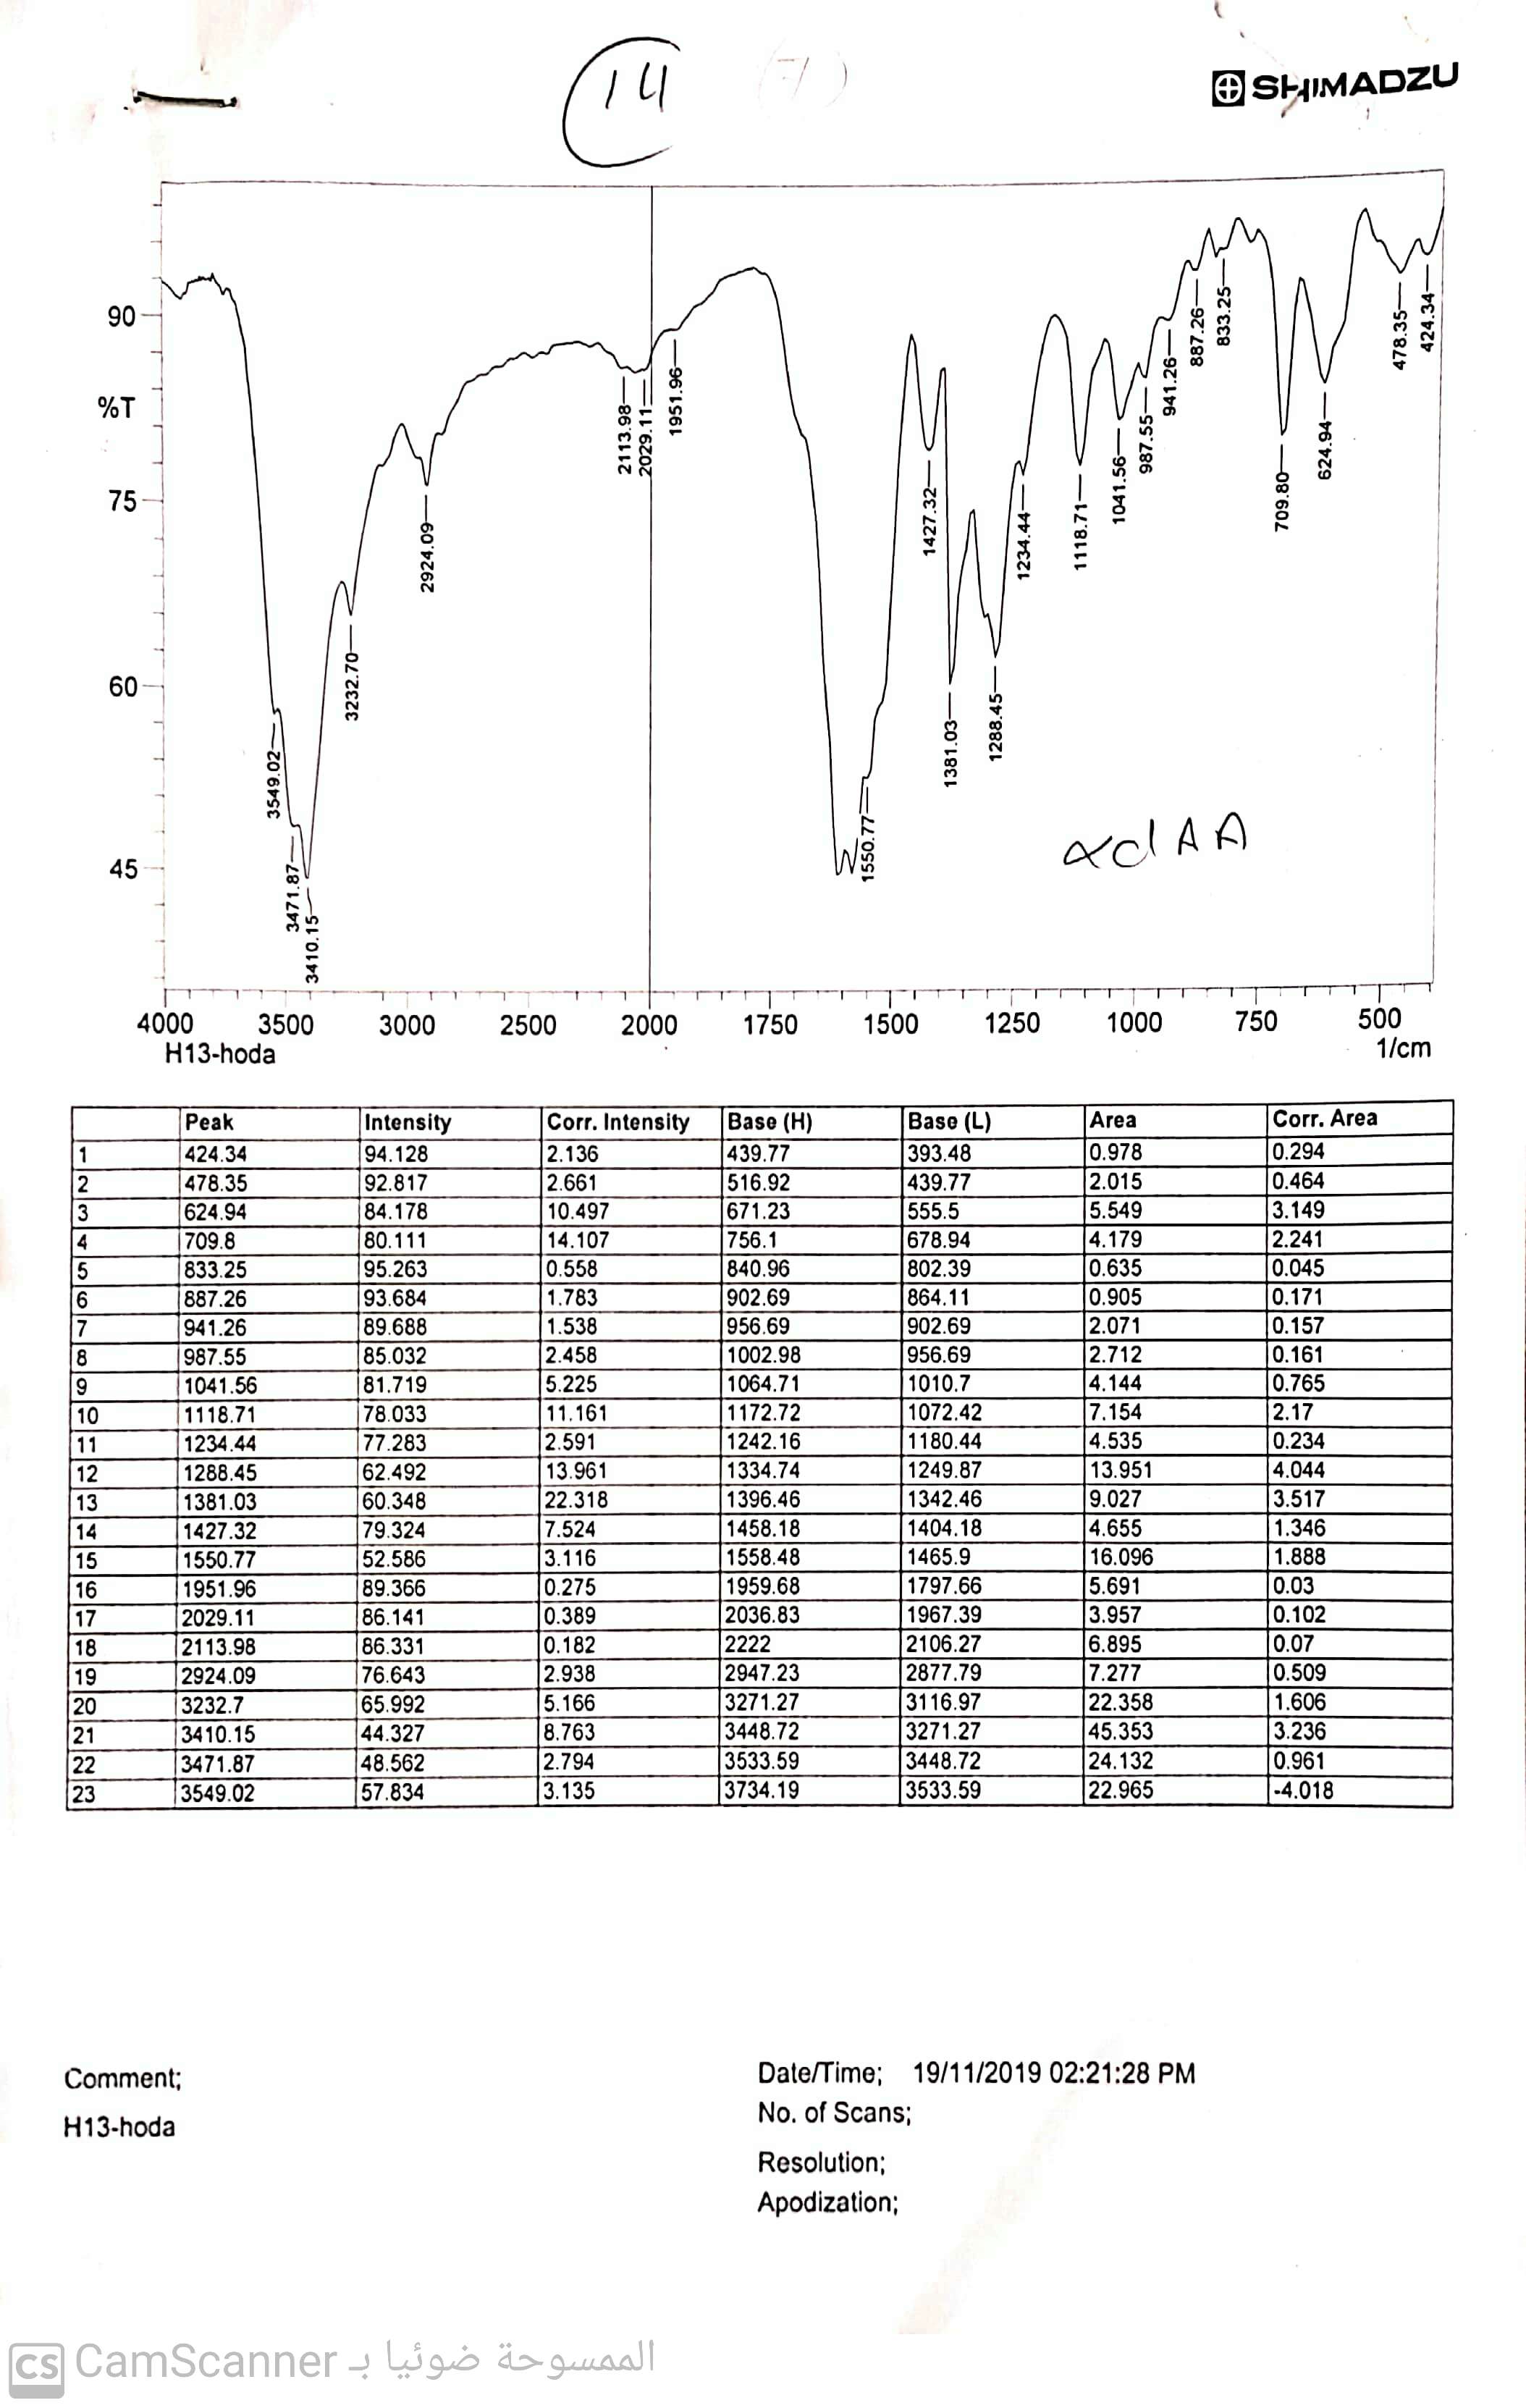
**

**IR of compound 14**

**
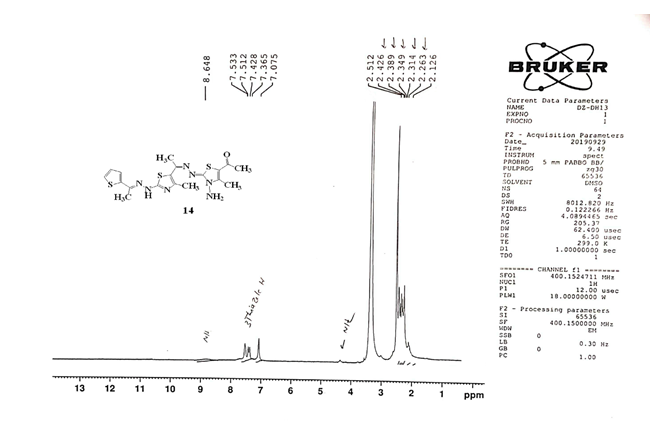
**

**1H-NMR of compound 14**

**
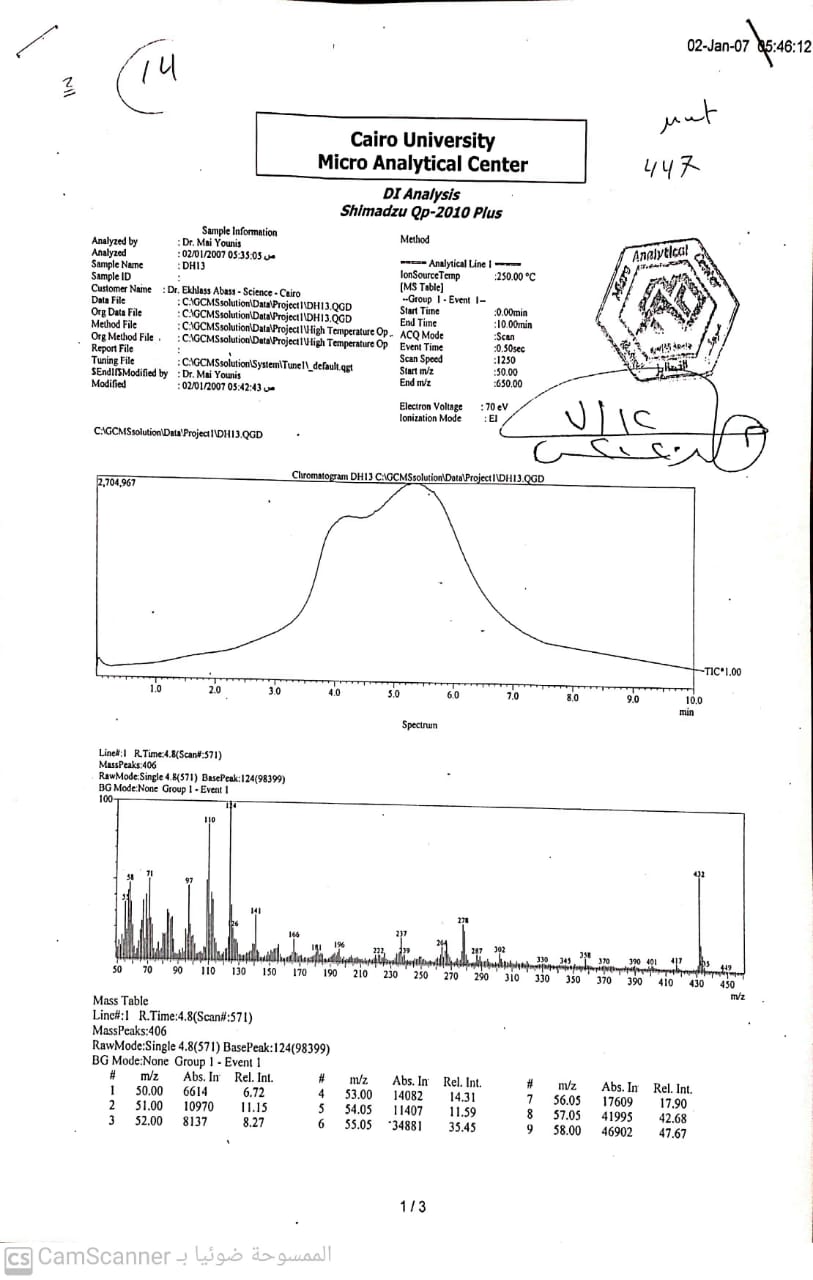
**

**Mass of compound 14**

**
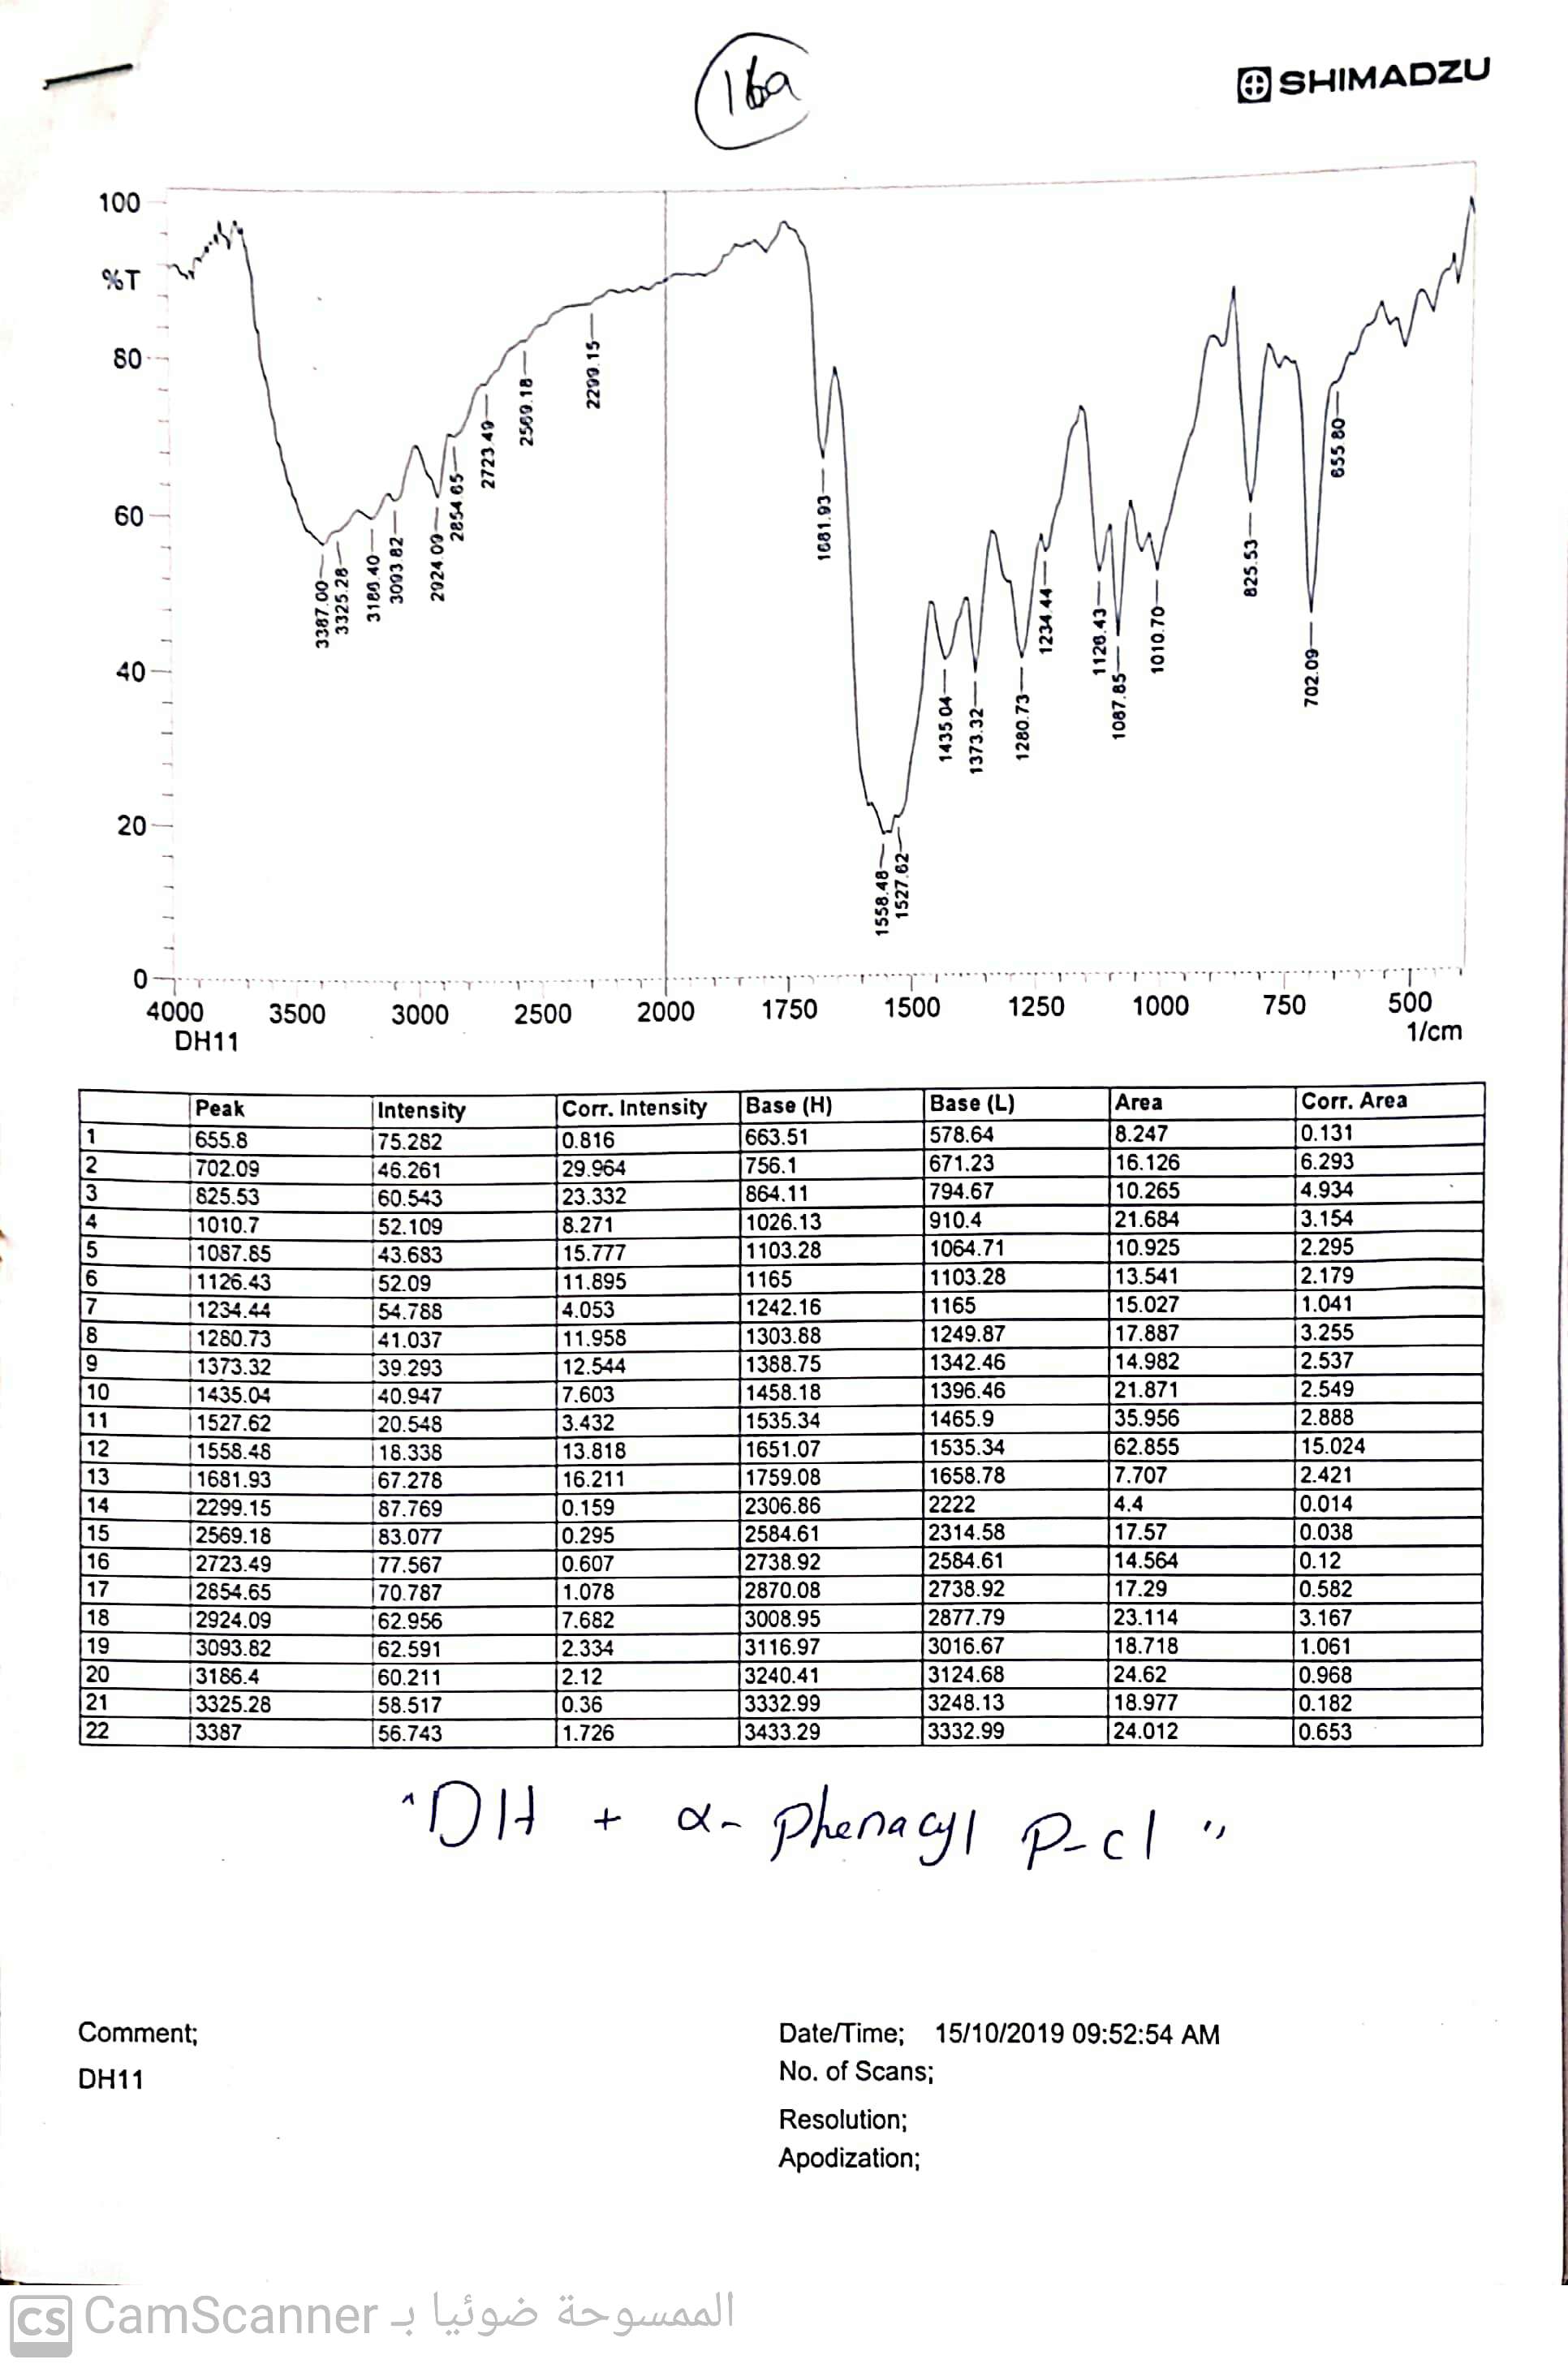
**

**IR of compound 16a**

**
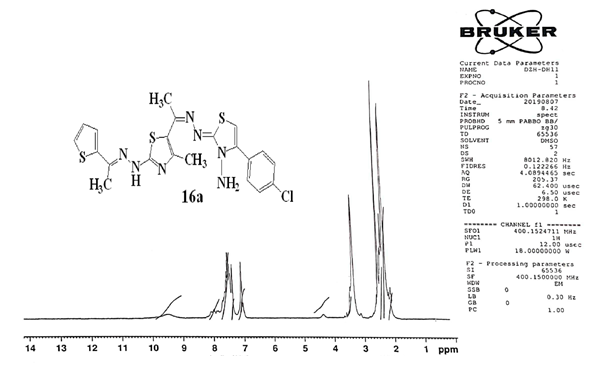
**

**1H-NMR of compound 16a**

**
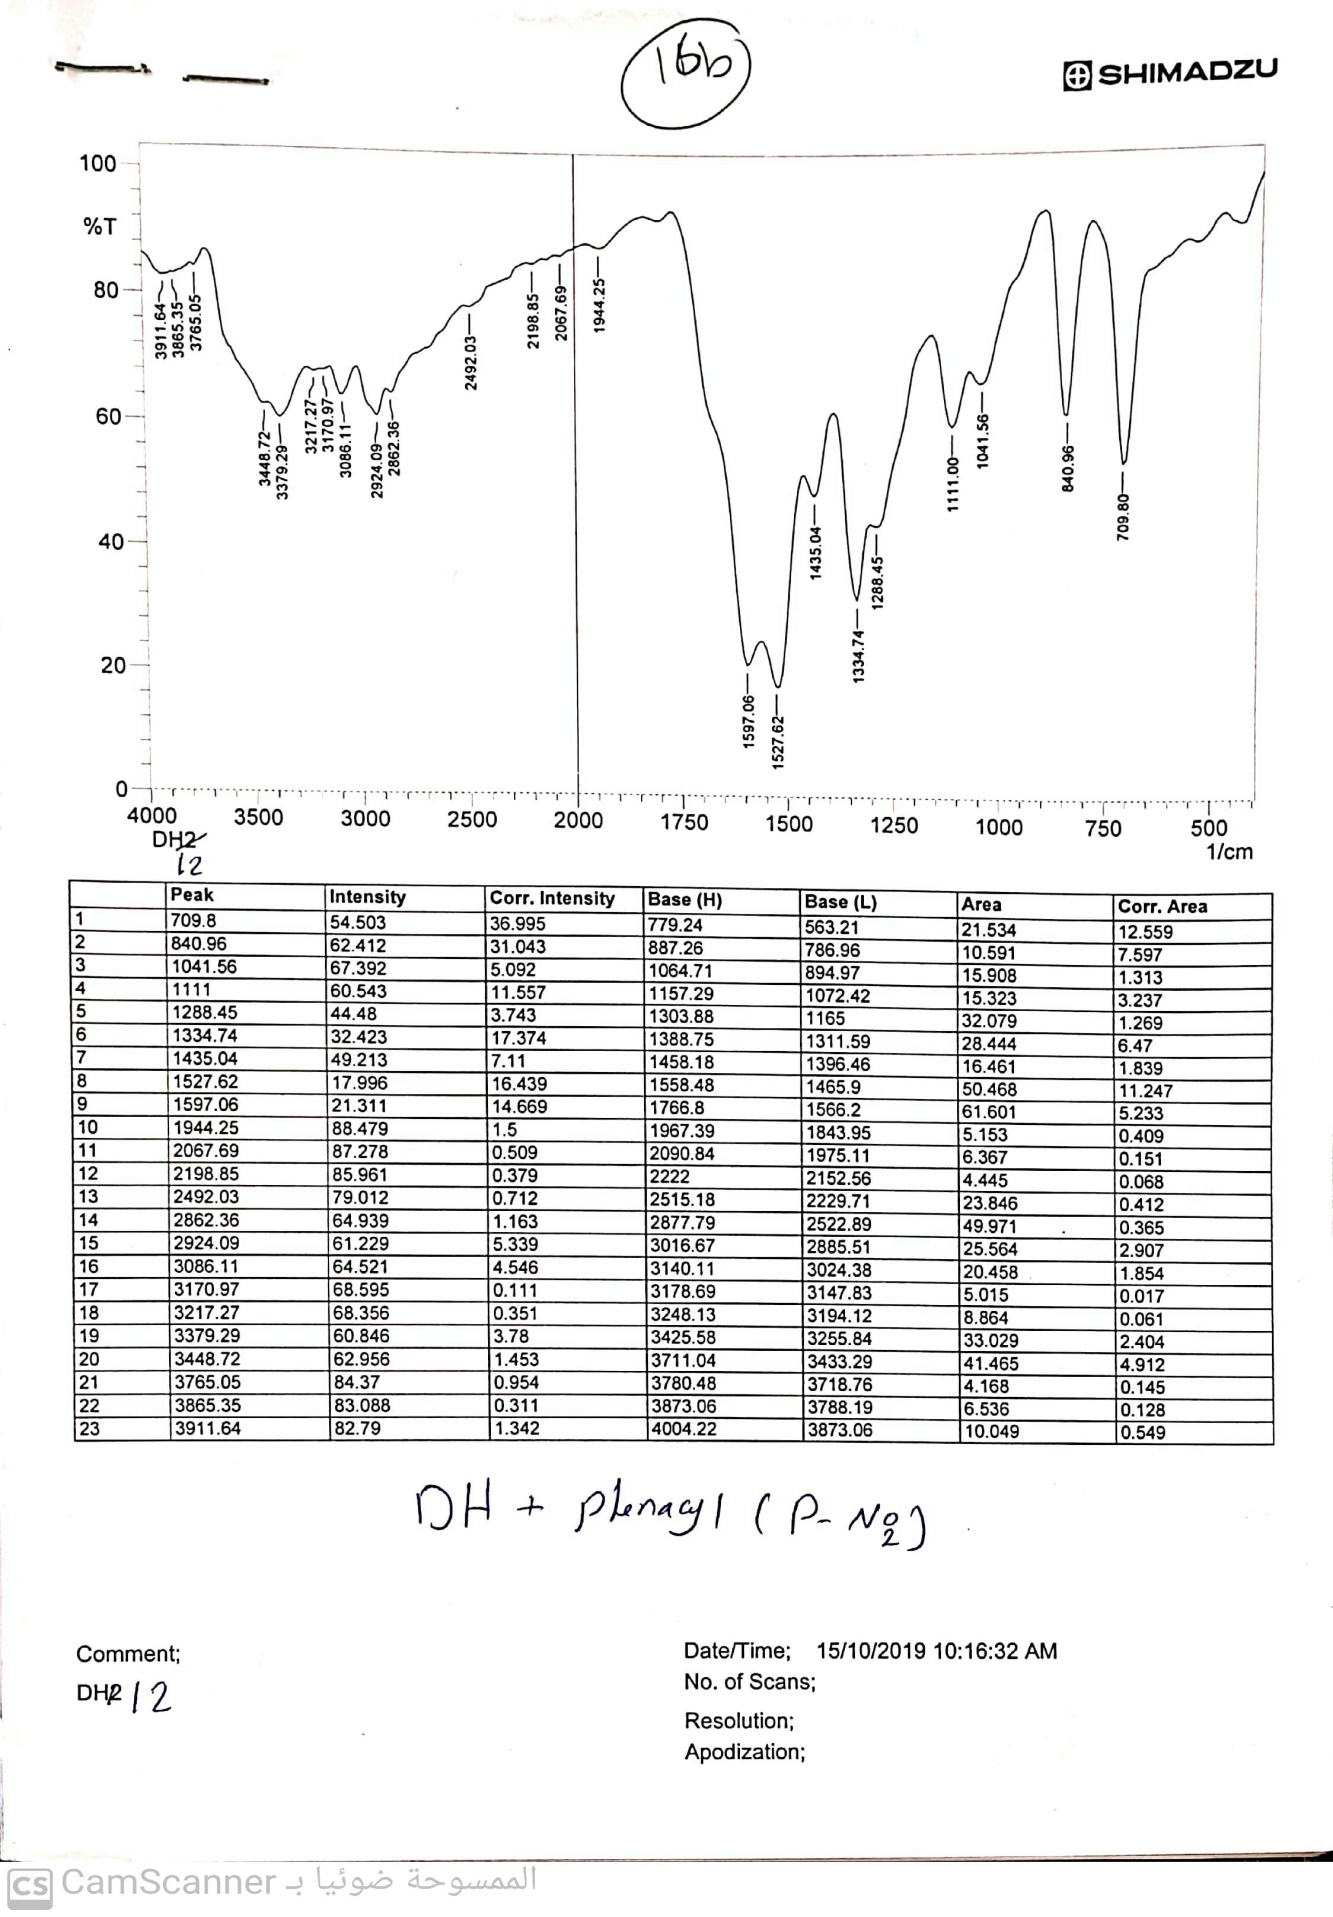
**

**IR of compound 16b**

**
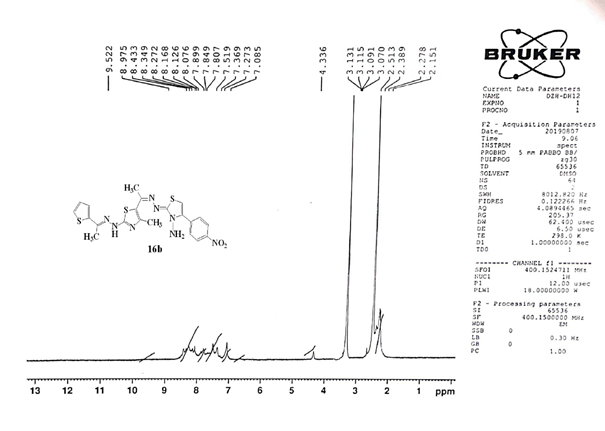
**

**1H-NMR of compound 16b**

**
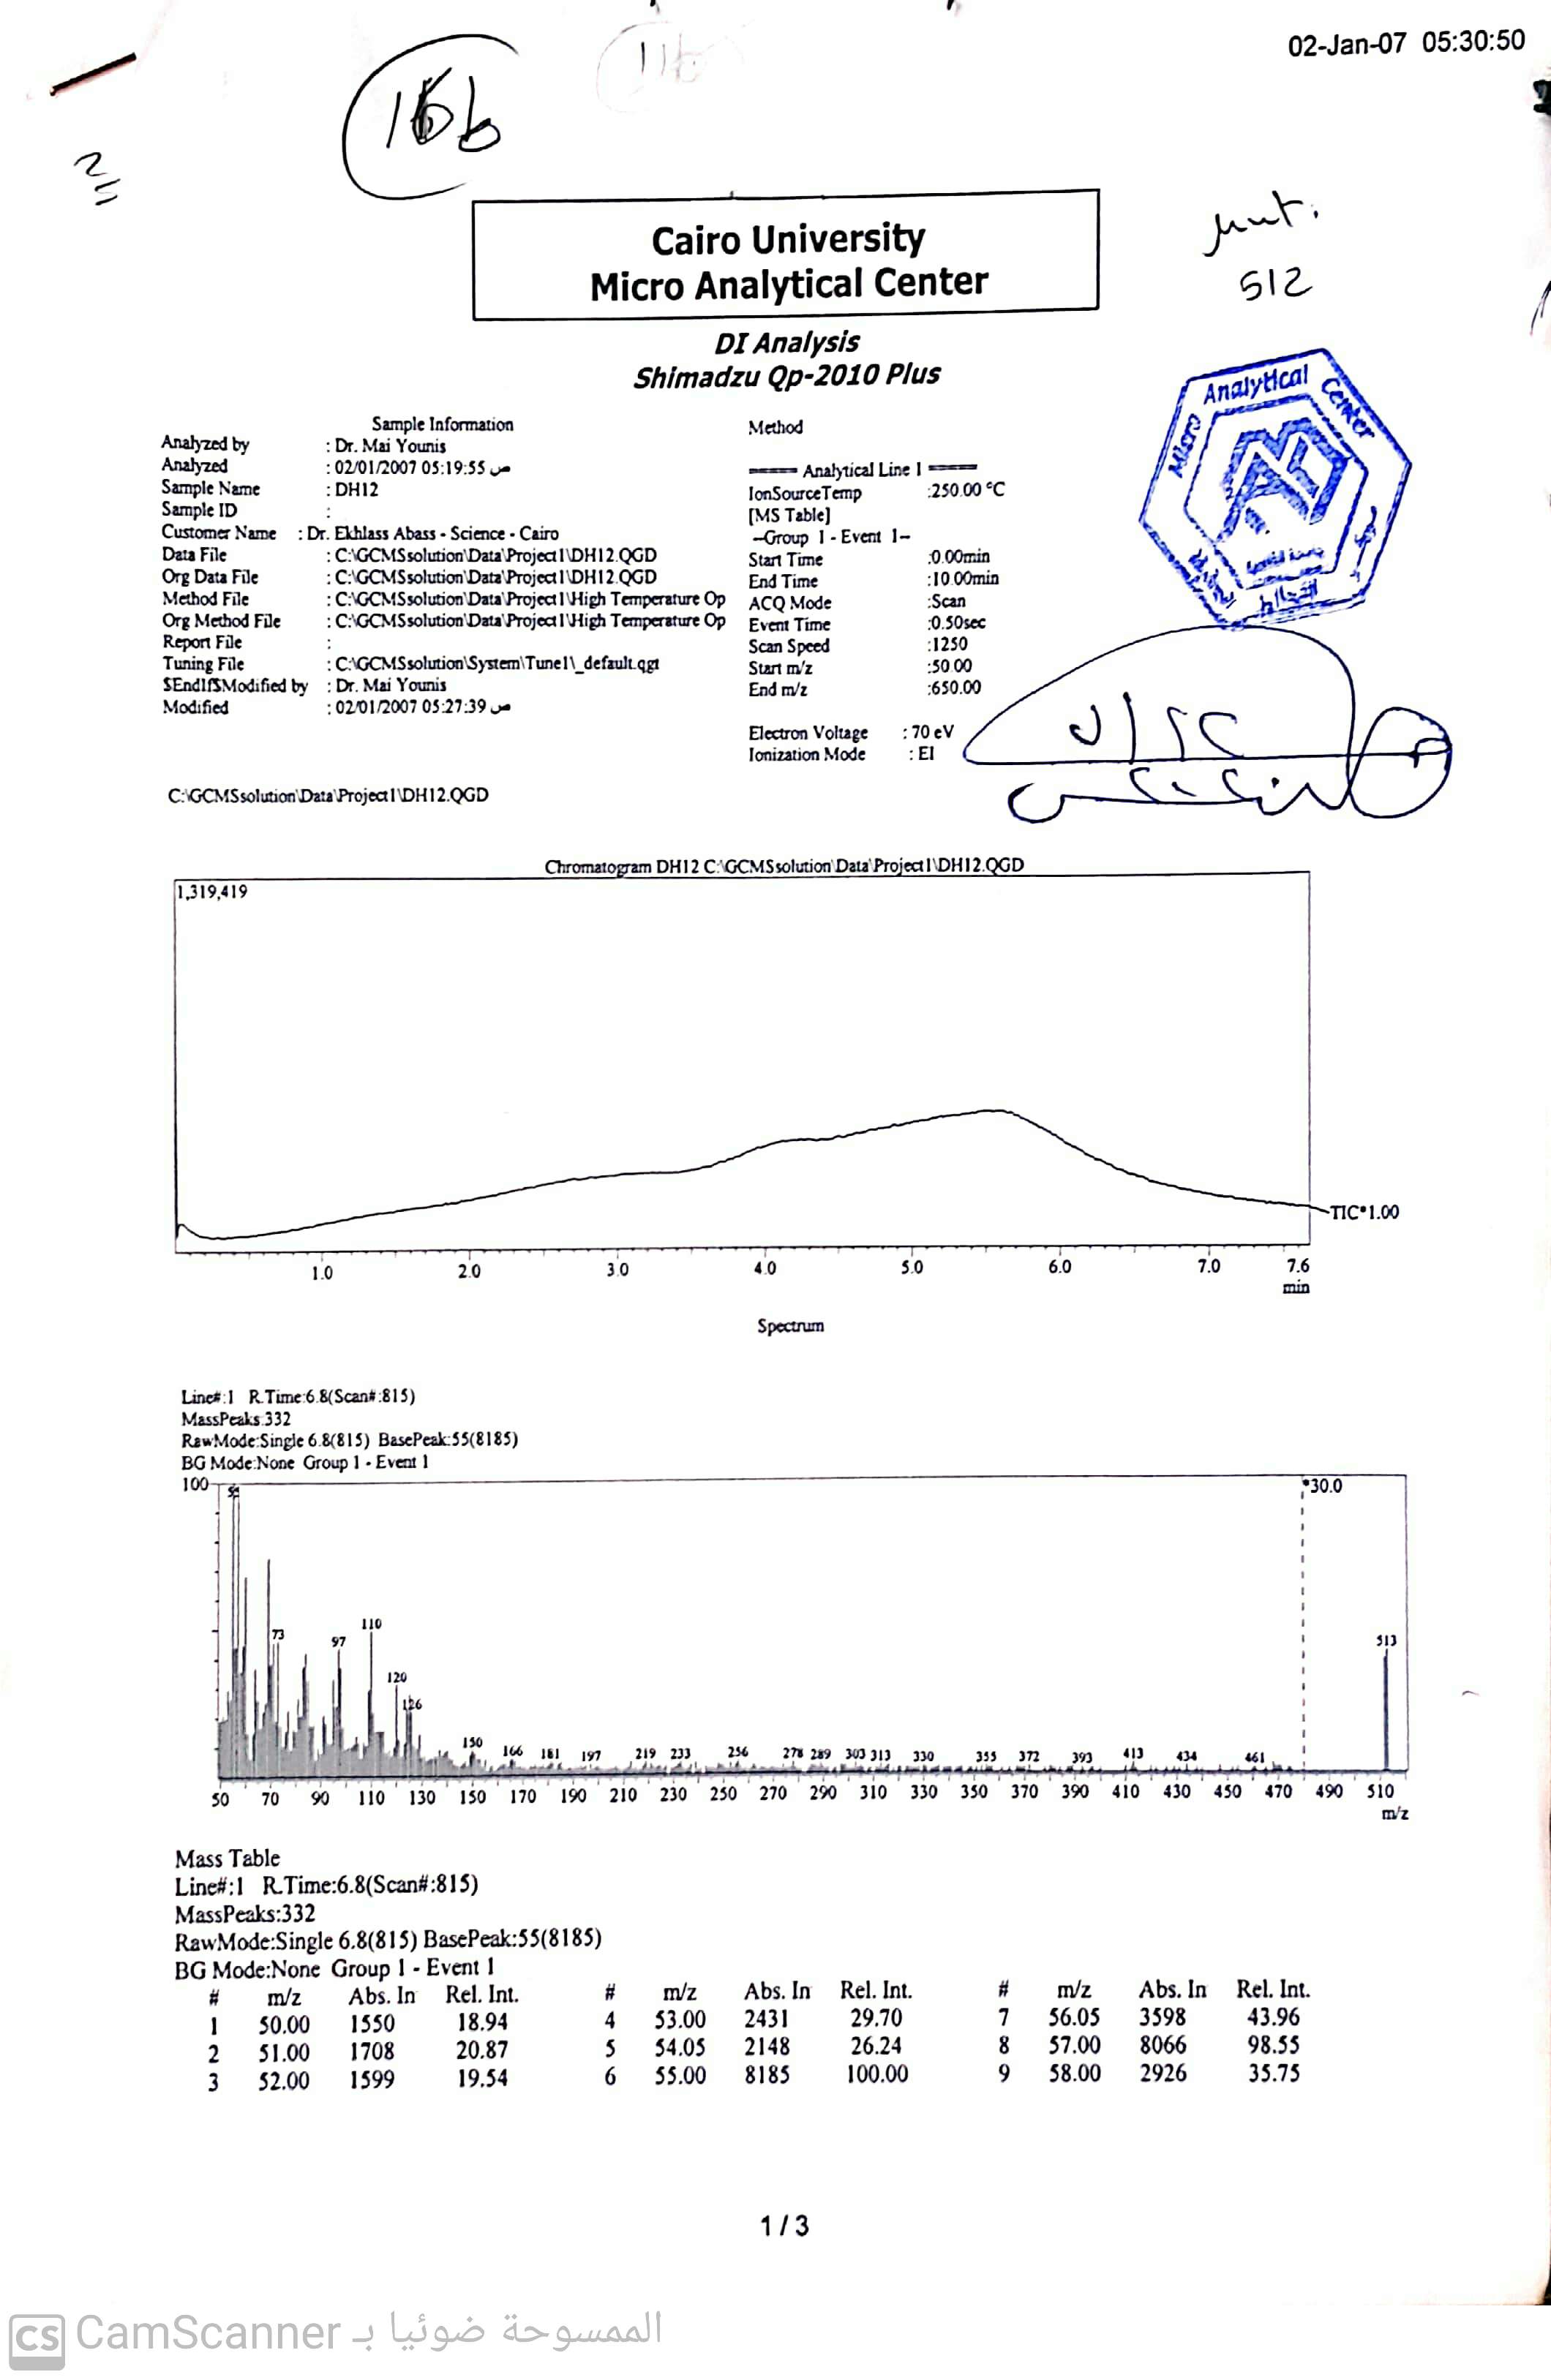
**

**Mass of compound 16b**

**Figure S2.** Spectral data for some compounds.


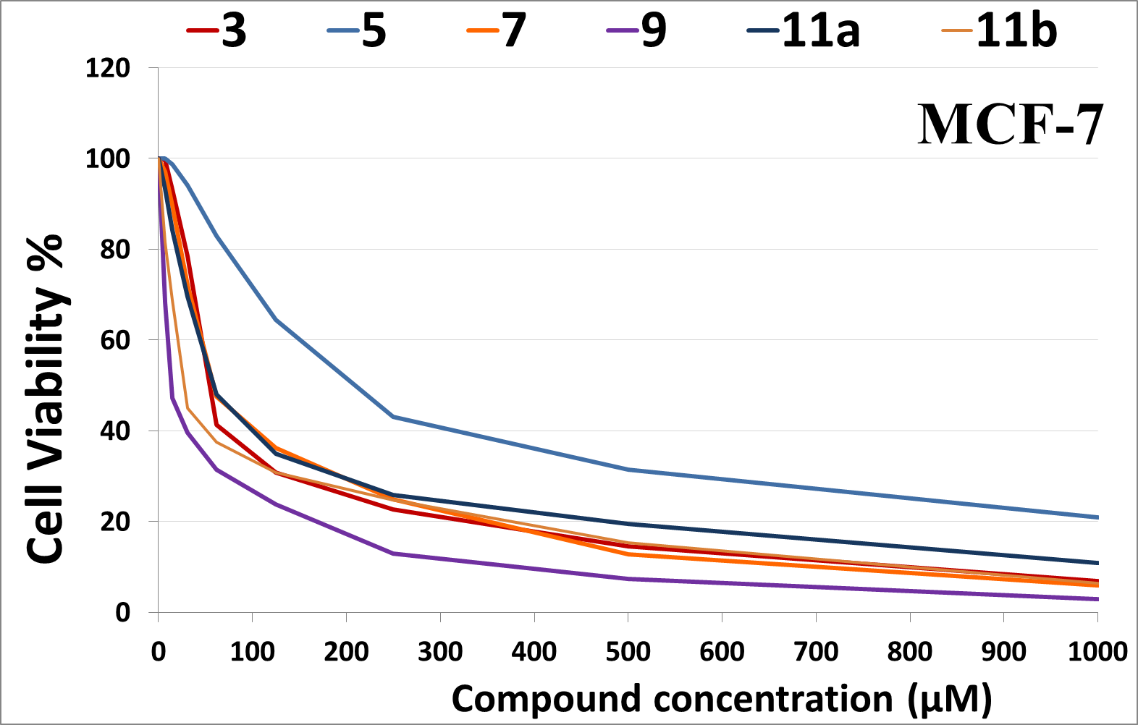


**Figure S3a.** Cell viability% of compounds **3, 5, 7, 9, 11a** and **11b** versus compound concentration (µM**)**


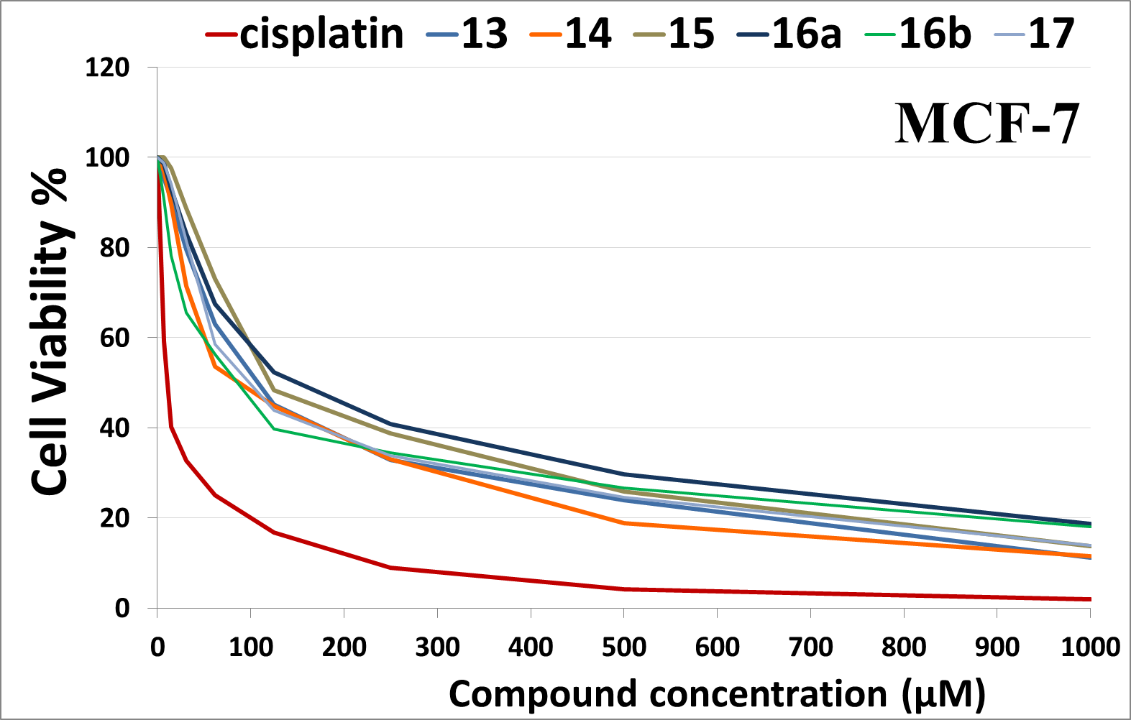


**Figure S3b.** Cell viability% of compounds **13, 14, 15, 16a, 16b** and **17**versus compound concentration (µM)


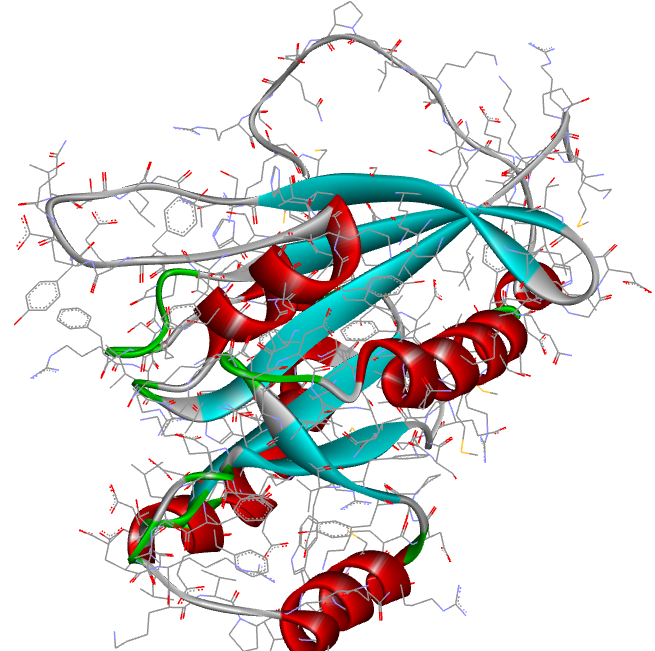


**Figure S4.** The 3D structure of Rab7b protein

**
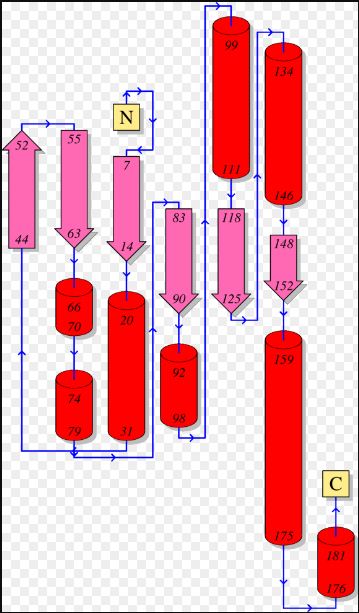
**

**Figure S5.** The homology model of the target consists of 8 α-helices and 6 β-strands

**Figure S6.** The abundance of amino acids in Rab7b protein


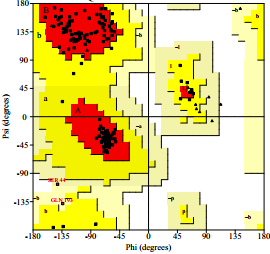


**Figure S7.** Ramachandran plot of the modeled Rab7b. Red color represents the most favored regions, while yellow color represents the allowed regions


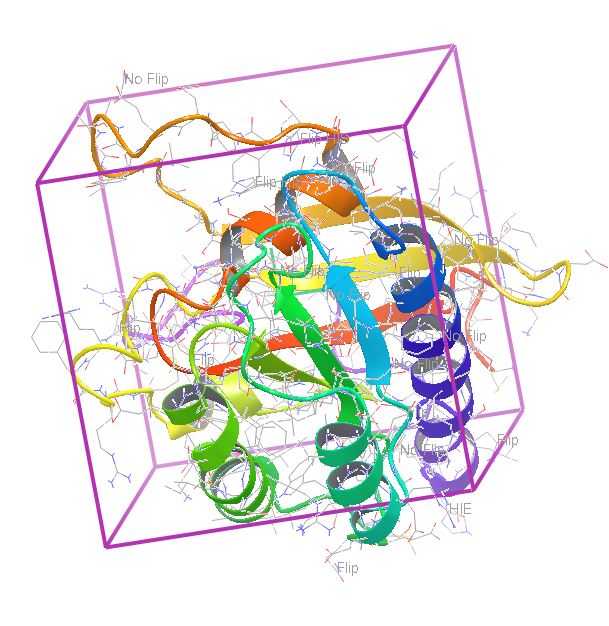


**Figure S8.** Grid box around the binding site cavity
